# Supplementary material for: Non-Antibiotic Antimony-Based Antimicrobials
Source: MDPI journal article supplement (doi:10.3390/molecules27217171), 2022-10-23

# Pages of Supporting Information for the paper

## Non-antibiotic antimony-based antimicrobials.

by

Nikolay Gerasimchuk<sup>1\*</sup>, Kevin Pinks<sup>1</sup>, Tarosha Salpadoru<sup>2</sup>, Kaitlyn Cotton<sup>2</sup>, Olga Michka<sup>2</sup>,  
Marianna Patrauchan<sup>2\*</sup> and Karen L. Wozniak<sup>2</sup>

Actual photographs under microscope of crystalline thallium(I) cyanoximates containing thioamide groups: **A** – TI(TCO), **B** - TI(TDCO) and **C** - bulk powders of these compounds. Elemental analysis data for the latter compound are in the lower panel.

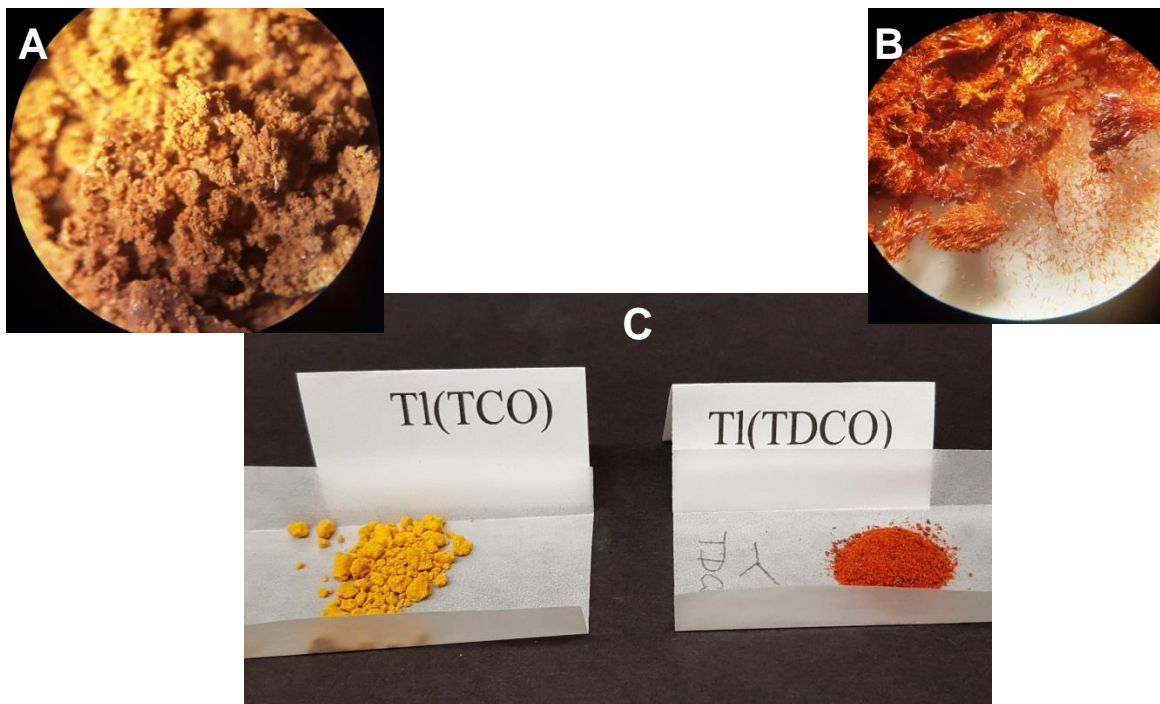

### ATLANTIC MICROLAB, INC.

Sample No. Ti(TDCO)-batch-1

6180 Atlantic Blvd. Suite M  
Norcross, GA 30071

[www.atlanticmicrolab.com](http://www.atlanticmicrolab.com)

PROFESSOR/SUPERVISOR: Prof. N. Gerasimchuk

PO# / CC#:

#### SUBMITTER

Company / School Missouri State University

Address 901 South National Avenue, Temple Hall 456

Dept. Chemistry

NAME Kevin Pinks

DATE 12/21/18

PHONE (417) 836-55-08

| Element | Theory  | Found |  | Single <input checked="" type="checkbox"/>                                                                                                                           | Duplicate <input type="checkbox"/> |
|---------|---------|-------|--|----------------------------------------------------------------------------------------------------------------------------------------------------------------------|------------------------------------|
| C       | 16.6600 | 16.84 |  | Elements Present:                                                                                                                                                    |                                    |
| H       | 1.6800  | 1.61  |  | Analyze for:                                                                                                                                                         |                                    |
| N       | 11.6500 | 11.77 |  | Hygroscopic <input type="checkbox"/> Explosive <input type="checkbox"/>                                                                                              |                                    |
|         |         |       |  | M.P. _____ B.P. _____                                                                                                                                                |                                    |
|         |         |       |  | To be dried: Yes <input type="checkbox"/> No <input type="checkbox"/>                                                                                                |                                    |
|         |         |       |  | Temp. _____ Vac. _____ Time _____                                                                                                                                    |                                    |
|         |         |       |  | RUSH SERVICE <input type="checkbox"/> Rush service guarantees analyses will be completed and results available by 5pm EST on the day the sample is received by 11am. |                                    |
|         |         |       |  | Include Email Address or Fax # Below                                                                                                                                 |                                    |

Date Received  
Remarks:

DEC 27 2018

Date Completed

DEC 28 2018

Instrumentation and accessories used for separation of organoantimony(V) cyanoximates from Ag(I)Br. A Thermo Scientific centrifuge (left) with nylon Eppendorf tubes and an insert for filtering (right, with arrow).

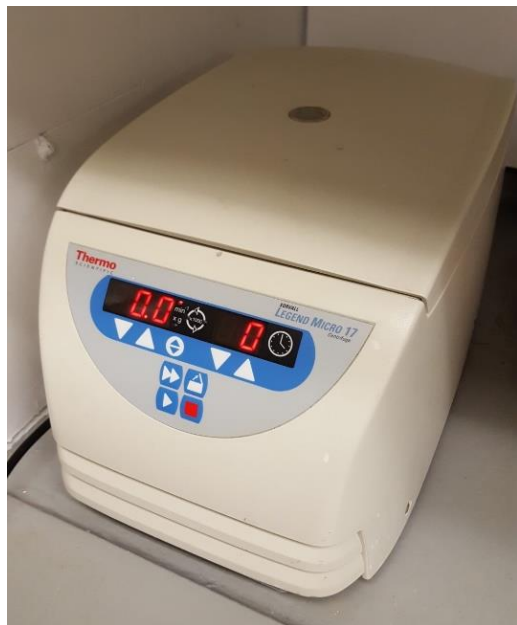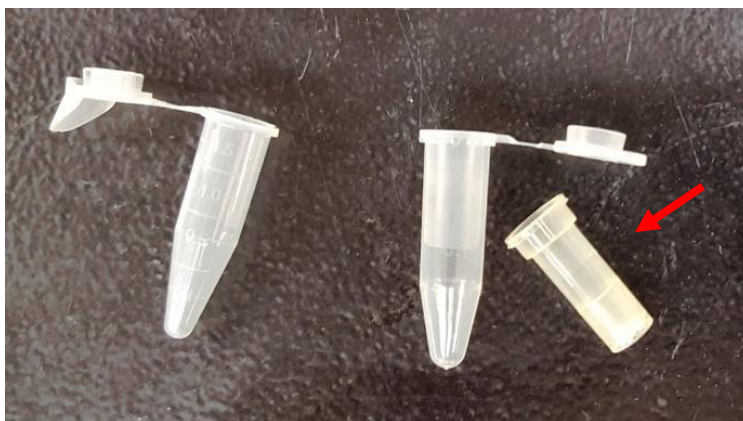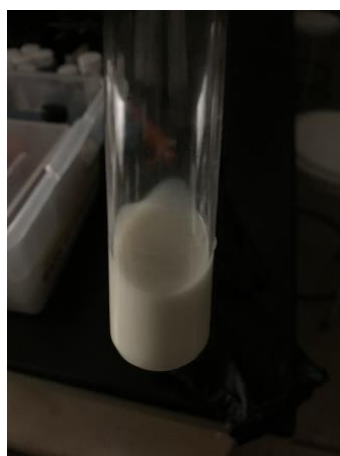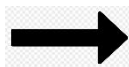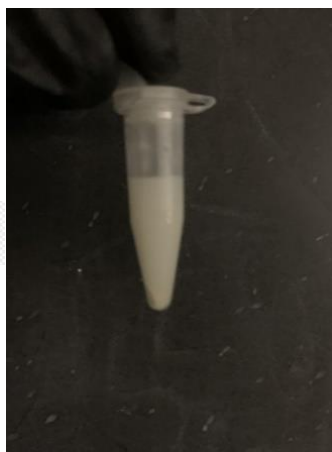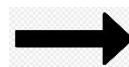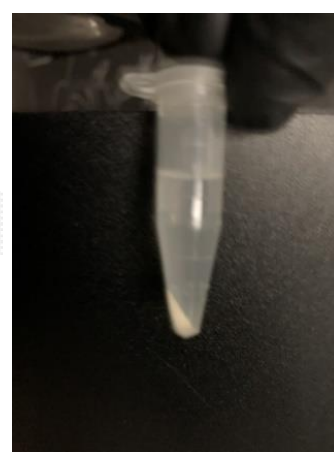

Homogenized mixture of  $\text{Sb}(\text{Ph})_4(\text{MCO})$  and  $\text{AgBr}$  in  $\text{CH}_3\text{CN}$  (left panel), then transferred into an Eppendorf tube (middle), and after centrifugation (right panel).

Preparation of TI(TCO) was carried out using the reaction and procedure shown below:

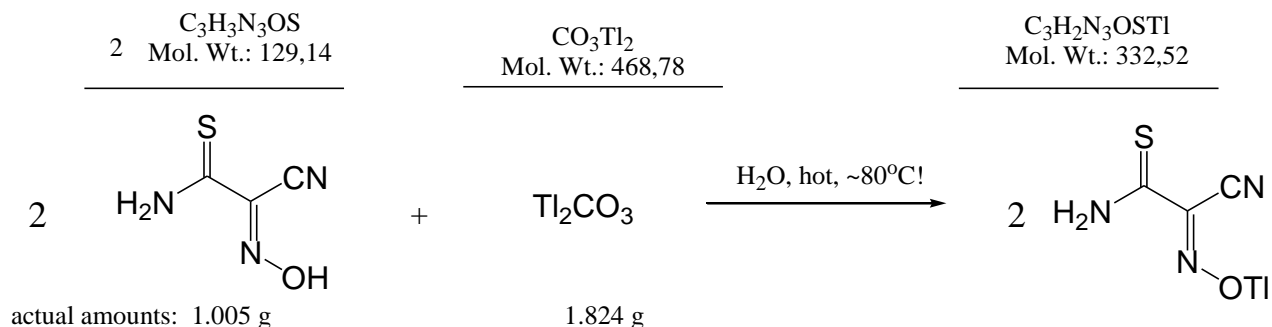

To a solution of 1.005 g (7.78 mM) of H(TCO) in 15 mL of distilled and degassed water at  $\sim 80^\circ\text{C}$  in the Schlenk flask under flow of argon a solution of 1.824 g (3.90 mM) of thallium(I) carbonate were added ad once under intense stirring. In 10-15 seconds massive orange precipitate formed. It was filtered, washed with 5 mL of DI water and dried in desiccator giving 3.781 g of TI(TCO) with 91% yield. Actual appearance of the salt is shown in SI1 above, while results of elemental analysis determination are presented below.

## ATLANTIC MICROLAB, INC.

Sample No. TI(TCO)

6180 Atlantic Blvd. Suite M  
Norcross, GA 30071

[www.atlanticmicrolab.com](http://www.atlanticmicrolab.com)

PROFESSOR/SUPERVISOR: Prof. N. Gerasimchuk

PO# / CO#:

### SUBMITTER

Company / School: Missouri State University

Address: 901 South National Avenue

Dept.: Chemistry Temple Hall 431

Springfield, MO 65807

NAME: Kevin Pinks DATE: 3/4/19

PHONE: (417) 836-5507 - FAX:

| Element | Theory  | Found |  | Single <input checked="" type="checkbox"/> Duplicate <input type="checkbox"/>                                                                                         |
|---------|---------|-------|--|-----------------------------------------------------------------------------------------------------------------------------------------------------------------------|
| C       | 10.8400 | 11.07 |  | Elements Present: C,H,N,O,S,Ti                                                                                                                                        |
| H       | 0.6100  | 0.44  |  | Analyze for: C,H,N,S                                                                                                                                                  |
| N       | 12.6400 | 12.35 |  | Hygroscopic <input type="checkbox"/> Explosive <input type="checkbox"/>                                                                                               |
| S       | 9.6400  | 9.74  |  | M.P. _____ B.P. _____                                                                                                                                                 |
|         |         |       |  | To be dried: Yes <input type="checkbox"/> No <input type="checkbox"/>                                                                                                 |
|         |         |       |  | Temp. _____ Vac. _____ Time _____                                                                                                                                     |
|         |         |       |  | RUSH SERVICE <input type="checkbox"/> Rush service guarantees analysis will be completed and results available by 6pm EST on the day this sample is received by 11am. |
|         |         |       |  | Include Email Address or Fax # Below                                                                                                                                  |

Date Received

MAR 07 P.M.

Date Completed

MAR 08 2019

Remarks:

Actual photographs under microscope of crystalline organoantimony(V) cyanoximates containing thioamide groups: **A** -  $\text{SbPh}_4(\text{TCO})$ , **B** -  $\text{SbPh}_4(\text{TDCO})$ .

**A**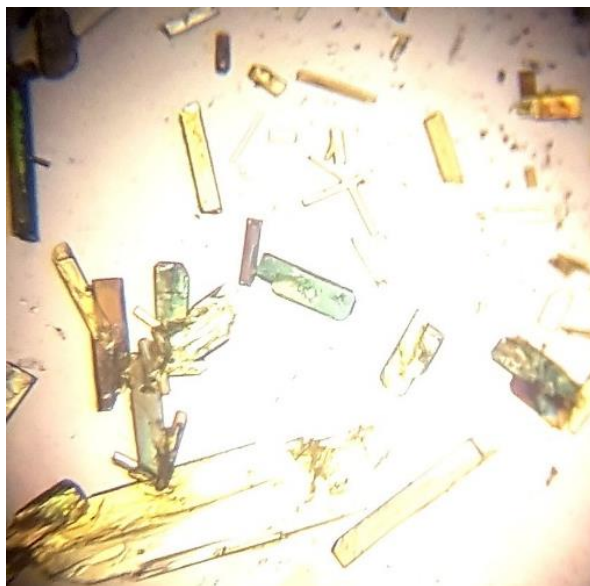**B**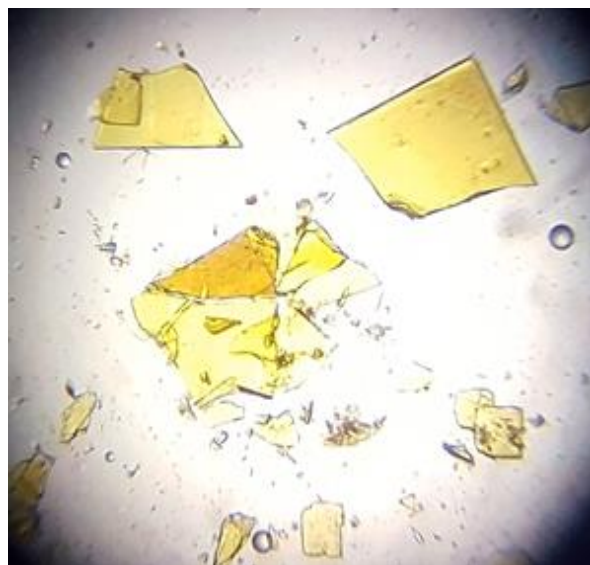

**Table S1.** Tentative assignment of important vibrational frequencies ( $\text{cm}^{-1}$ ) for synthesized organoantimony(V) cyanoximates.

| Compound                              | vibrations in cyanoxime group |                               |                                     |                                       |                                      |                          |                     | $\text{C}_6\text{H}_5$ - group and Sb-Ph vibrations |                     |              |
|---------------------------------------|-------------------------------|-------------------------------|-------------------------------------|---------------------------------------|--------------------------------------|--------------------------|---------------------|-----------------------------------------------------|---------------------|--------------|
|                                       | $\nu(\text{NH}_2)$            | $\nu(\text{C}\equiv\text{N})$ | $\nu(\text{C}=\text{X})^{\text{a}}$ | $\nu(\text{C}=\text{N})_{\text{pyr}}$ | $\nu(\text{C}=\text{N})_{\text{ox}}$ | $\nu(\text{N}-\text{O})$ | $\rho(\text{NH}_2)$ | $\nu_{\text{as}}(\text{C}-\text{H})$                | $\gamma(\nu'_{1g})$ | $\nu(\nu_8)$ |
| $\text{Sb}(\text{Ph})_4(2\text{PCO})$ | -                             | 2213                          | -                                   | 1589                                  | 1463                                 | 1016                     | -                   | 3094                                                | 463, 433            | 689          |
| $\text{Sb}(\text{Ph})_4(3\text{PCO})$ | -                             | 2218                          | -                                   | 1574                                  | 1473                                 | 1065                     | -                   | 3051                                                | 459, 444            | 687          |
| $\text{Sb}(\text{Ph})_4(4\text{PCO})$ | -                             | 2216                          | -                                   | 1590                                  | 1468                                 | 1114                     | -                   | 3057                                                | 454, 442, 431       | 687          |
| $\text{Sb}(\text{Ph})_4(\text{ACO})$  | 3439, 3366                    | 2222                          | 1679                                | -                                     | 1478                                 | 1086                     | 1580                | 3053                                                | 442                 | 688          |
| $\text{Sb}(\text{Ph})_4(\text{ECO})$  | -                             | 2217                          | 1703                                | -                                     | 1477                                 | 1091                     | -                   | 3052                                                | 458, 436            | 689          |
| $\text{Sb}(\text{Ph})_4(\text{MCO})$  | -                             | 2223                          | 1629                                | -                                     | 1497                                 | 1063                     | -                   | 3061                                                | 443                 | 690          |
| $\text{Sb}(\text{Ph})_4(\text{TCO})$  | 3465, 3341                    | 2220                          | 889                                 | -                                     | 1583                                 | 1067                     | 1618                | 3062                                                | 450                 | 692          |
| $\text{Sb}(\text{Ph})_4(\text{TDCO})$ | -                             | 2216                          | 973                                 | -                                     | 1524                                 | 1069                     | -                   | 3066                                                | 445                 | 688          |

<sup>a</sup> X = sulfur atom (for TCO<sup>-</sup> and TDCO<sup>-</sup>), oxygen atom (for 2PCO<sup>-</sup>, 3PCO<sup>-</sup>, 4PCO<sup>-</sup>, ACO<sup>-</sup>, ECO<sup>-</sup>, MCO<sup>-</sup>). <sub>ox</sub> – oxime, <sub>pyr</sub> – pyridine

The  $^{13}\text{C}\{^1\text{H}\}$  NMR spectroscopic results for tetraphenylantimony(V) cyanoximates show expected chemical and magnetic equivalency of all four phenyl rings in structures and values of chemical shifts are tabulated below.

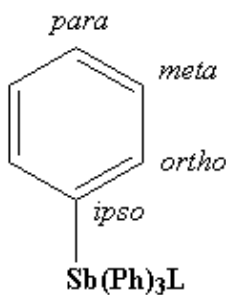

**Table S2.** Chemical shifts for the  $\text{Sb(Ph)}_4\text{Br}$  (as starting compound) and synthesized organoantimony(V) cyanoximates.

| Compound                                     | Assigned (ppm) |              |             |             |
|----------------------------------------------|----------------|--------------|-------------|-------------|
|                                              | <i>ipso</i>    | <i>ortho</i> | <i>meta</i> | <i>para</i> |
| <b><math>\text{Sb(Ph)}_4\text{Br}</math></b> | 135.38         | 135.04       | 129.44      | 131.15      |
| $\text{Sb(Ph)}_4(\text{ECO})$                | 133.97         | 135.57       | 129.207     | 136.96      |
| $\text{Sb(Ph)}_4(2\text{PCO})$               | 135.79         | 135.65       | 129.02      | 130.54      |
| $\text{Sb(Ph)}_4(3\text{PCO})$               | 131.53         | 135.48       | 129.17      | 130.75      |
| $\text{Sb(Ph)}_4(4\text{PCO})$               | 129.01         | 135.54       | 129.12      | 149.69      |
| $\text{Sb(Ph)}_4(\text{MCO})$                | 134.9          | 135.59       | 129.2       | 130.9       |
| $\text{Sb(Ph)}_4(\text{TCO})$                | 133.45         | 135.34       | 129.52      | 131.29      |

**Table S3.** Chemical shifts values for cyanoxime moieties in the  $^{13}\text{C}\{^1\text{H}\}$  NMR spectra of tetraphenylantimony(V) cyanoximates.

| Compound                              | Structure                                                                           | $\delta$ (ppm)                                                |
|---------------------------------------|-------------------------------------------------------------------------------------|---------------------------------------------------------------|
| $\text{Sb}(\text{Ph})_4(2\text{PCO})$ | 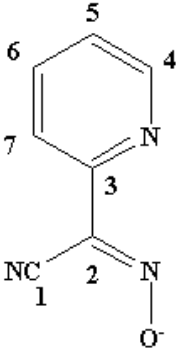   | $\text{C}_1$ - 112.03                                         |
|                                       |                                                                                     | $\text{C}_2$ - 132.38                                         |
|                                       |                                                                                     | $\text{C}_3$ - 152.24                                         |
|                                       |                                                                                     | $\text{C}_4$ - 148.79                                         |
|                                       |                                                                                     | $\text{C}_5, \text{C}_6, \text{C}_7$ - 135.79; 122.46; 118.24 |
|                                       |                                                                                     |                                                               |
|                                       |                                                                                     |                                                               |
| $\text{Sb}(\text{Ph})_4(3\text{PCO})$ |   | $\text{C}_1$ - 111.55                                         |
|                                       |                                                                                     | $\text{C}_2$ - 128.52                                         |
|                                       |                                                                                     | $\text{C}_3$ - 127.99                                         |
|                                       |                                                                                     | $\text{C}_4$ - 149.05                                         |
|                                       |                                                                                     | $\text{C}_5$ - 145.76                                         |
|                                       |                                                                                     | $\text{C}_6, \text{C}_7$ - 129.17; 123.09                     |
|                                       |                                                                                     |                                                               |
| $\text{Sb}(\text{Ph})_4(4\text{PCO})$ |  | $\text{C}_1$ - 111.56                                         |
|                                       |                                                                                     | $\text{C}_2$ - 150.15                                         |
|                                       |                                                                                     | $\text{C}_3$ - 140.05                                         |
|                                       |                                                                                     | $\text{C}_{4,4'}$ - 118.24                                    |
|                                       |                                                                                     | $\text{C}_{5,5'}$ - 149.69                                    |



**Table S3 (continued).** Chemical shifts values for cyanoxime moieties in the  $^{13}\text{C}\{^1\text{H}\}$  NMR spectra of tetraphenylantimony(V) cyanoximates.

| Compound                                                  | Structure                                                                           | $\delta$ (ppm)                                                |
|-----------------------------------------------------------|-------------------------------------------------------------------------------------|---------------------------------------------------------------|
| $\text{Sb}(\text{Ph})_4(\text{ECO})$                      | 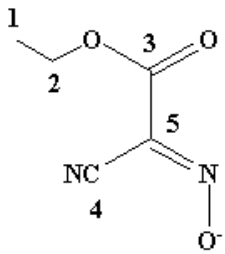   | $\text{C}_1$ - 112.03                                         |
|                                                           |                                                                                     | $\text{C}_2$ - 132.38                                         |
|                                                           |                                                                                     | $\text{C}_3$ - 152.24                                         |
|                                                           |                                                                                     | $\text{C}_4$ - 148.79                                         |
|                                                           |                                                                                     | $\text{C}_5, \text{C}_6, \text{C}_7$ - 135.79; 122.46; 118.27 |
|                                                           |                                                                                     |                                                               |
|                                                           |                                                                                     |                                                               |
| $\text{Sb}(\text{Ph})_4(\text{MCO})$                      |   | $\text{C}_1$ - 127.87                                         |
|                                                           |                                                                                     | $\text{C}_2$ - 111.54                                         |
|                                                           |                                                                                     | $\text{C}_3$ - 159.99                                         |
|                                                           |                                                                                     | $\text{C}_4$ - 46.60                                          |
|                                                           |                                                                                     | $\text{C}_5$ - 43.02                                          |
|                                                           |                                                                                     | $\text{C}_6$ - 66.53                                          |
|                                                           |                                                                                     | $\text{C}_7$ - 68.97                                          |
| $\text{Sb}(\text{Ph})_4(\text{TCO})$<br><i>trans-anti</i> |  | $\text{C}_1$ - 110.92                                         |
|                                                           |                                                                                     | $\text{C}_2$ - 131.63                                         |
|                                                           |                                                                                     | $\text{C}_3$ - 190.01                                         |
| $\text{Sb}(\text{Ph})_4(\text{TCO})$<br><i>trans-syn</i>  |  | $\text{C}_1$ - 116.92                                         |
|                                                           |                                                                                     | $\text{C}_2$ - 136.38                                         |
|                                                           |                                                                                     | $\text{C}_3$ - 184.98                                         |

The  $^{13}\text{C}\{^1\text{H}\}$  NMR spectrum of  $\text{SbPh}_4(3\text{PCO})$  in  $\text{CD}_2\text{Cl}_2$  at 295 K after 12,000 repetitions. Shown only  $sp^2$  and  $sp$  regions of spectrum. Asterisks indicate 4 signals from phenyl groups.

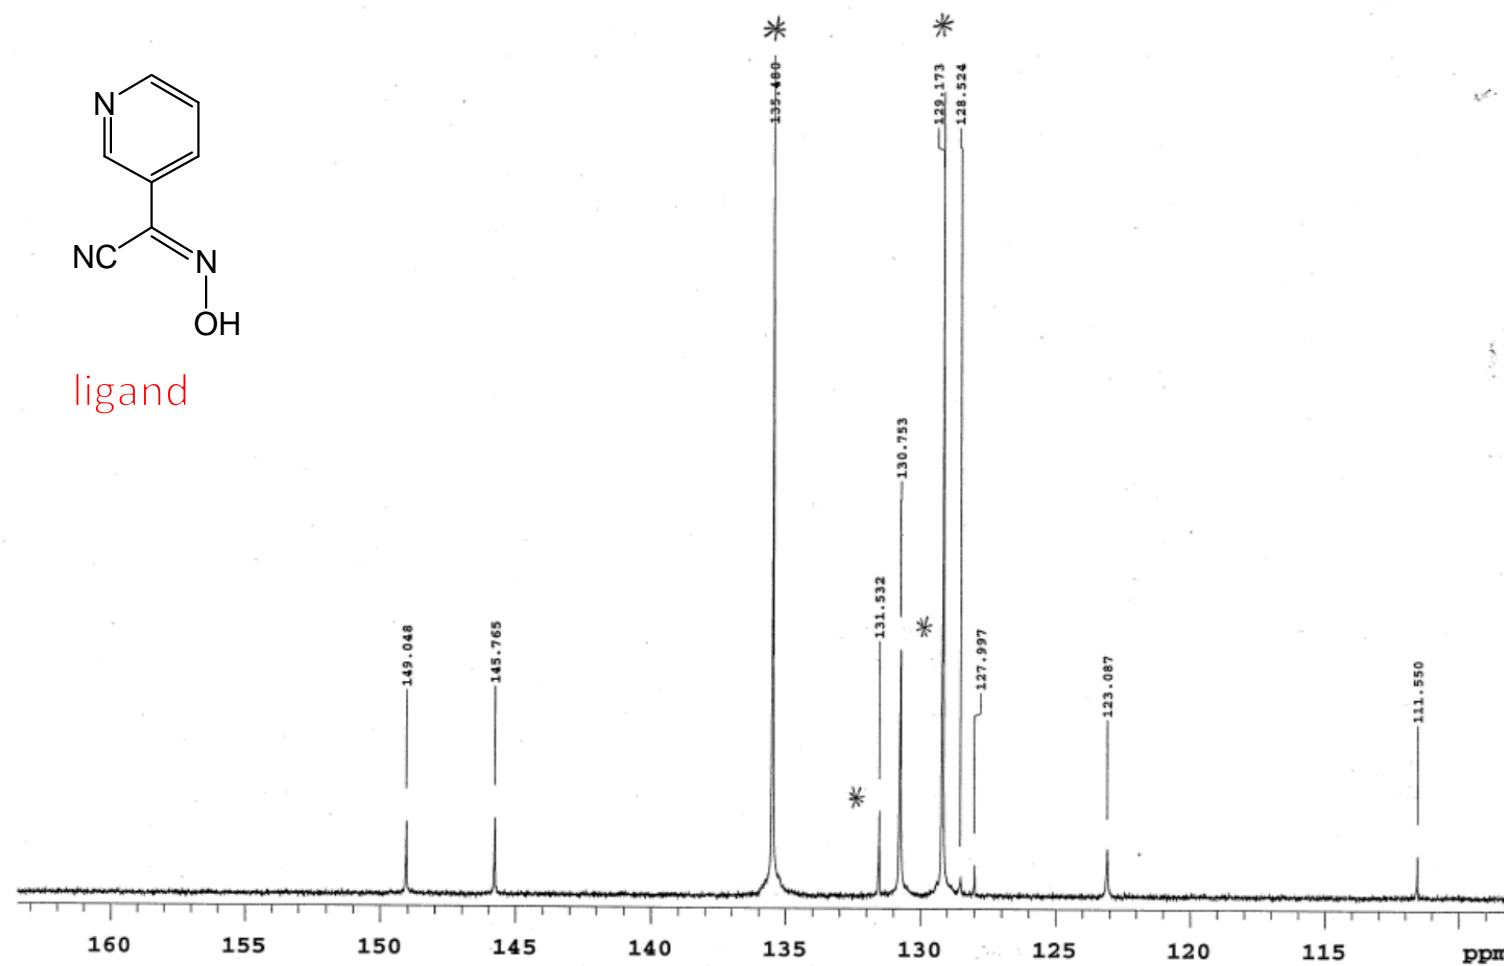

The  $^{13}\text{C}\{^1\text{H}\}$  NMR spectrum of  $\text{SbPh}_4(2\text{PCO})$  in  $\text{CD}_2\text{Cl}_2$  at 298 K after 20,000 repetitions. Shown full spectrum including solvent peaks. Asterisks indicate 4 signals from phenyl groups.

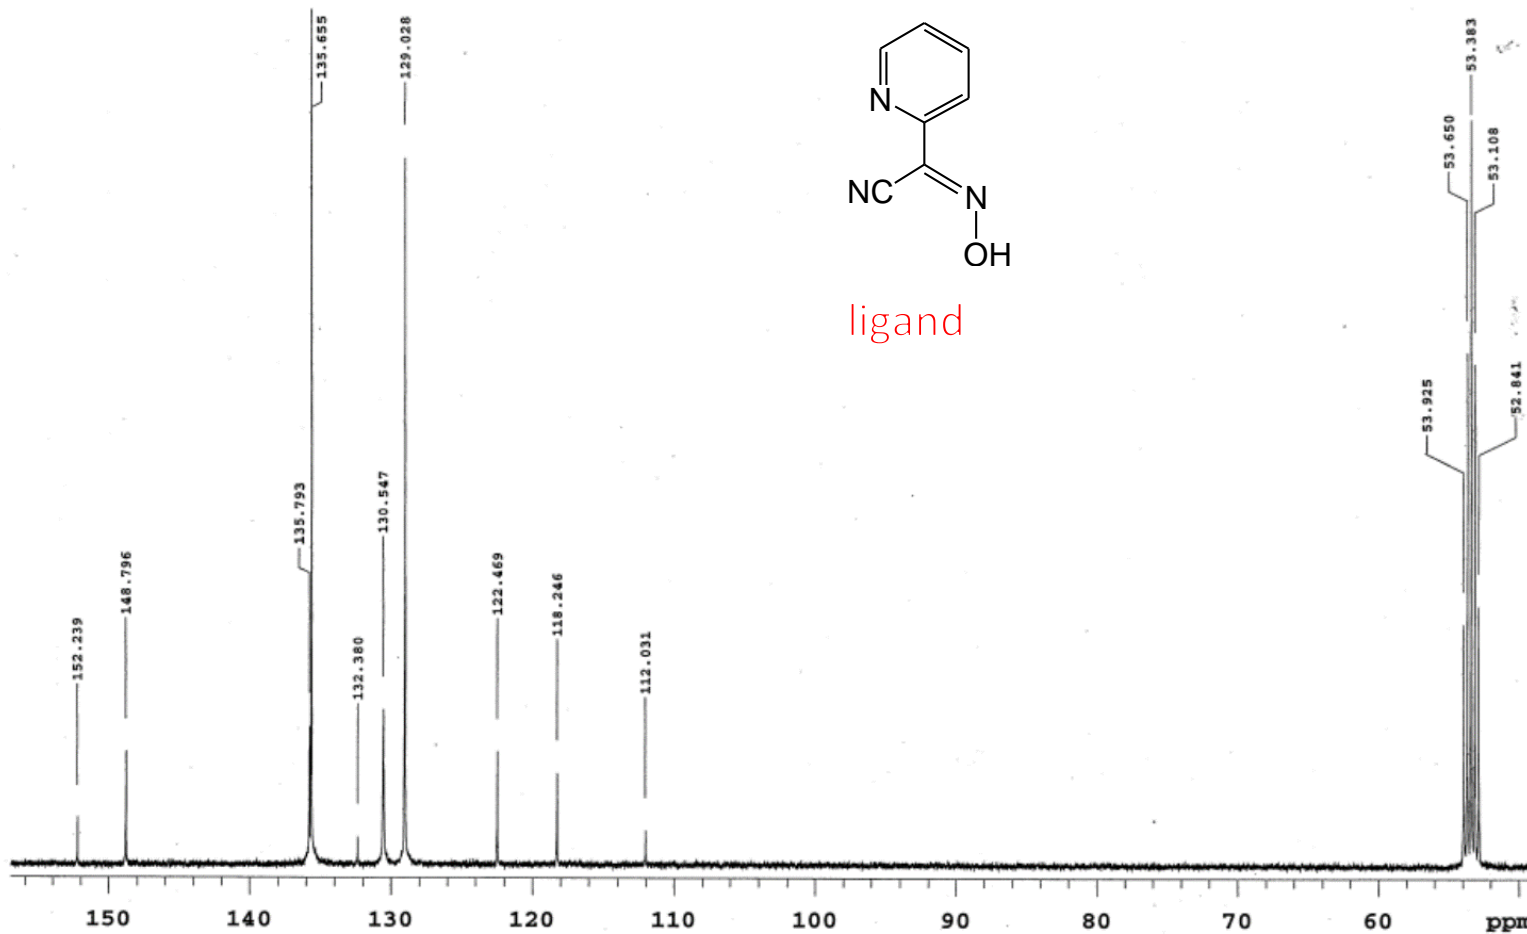

The  $^{13}\text{C}\{^1\text{H}\}$  NMR spectrum of  $\text{SbPh}_4(\text{ECO})$  in  $\text{CD}_2\text{Cl}_2$  at 298 K after 14,000 repetitions. Shown full spectrum including solvent peaks. Asterisks indicate 4 signals from phenyl groups.

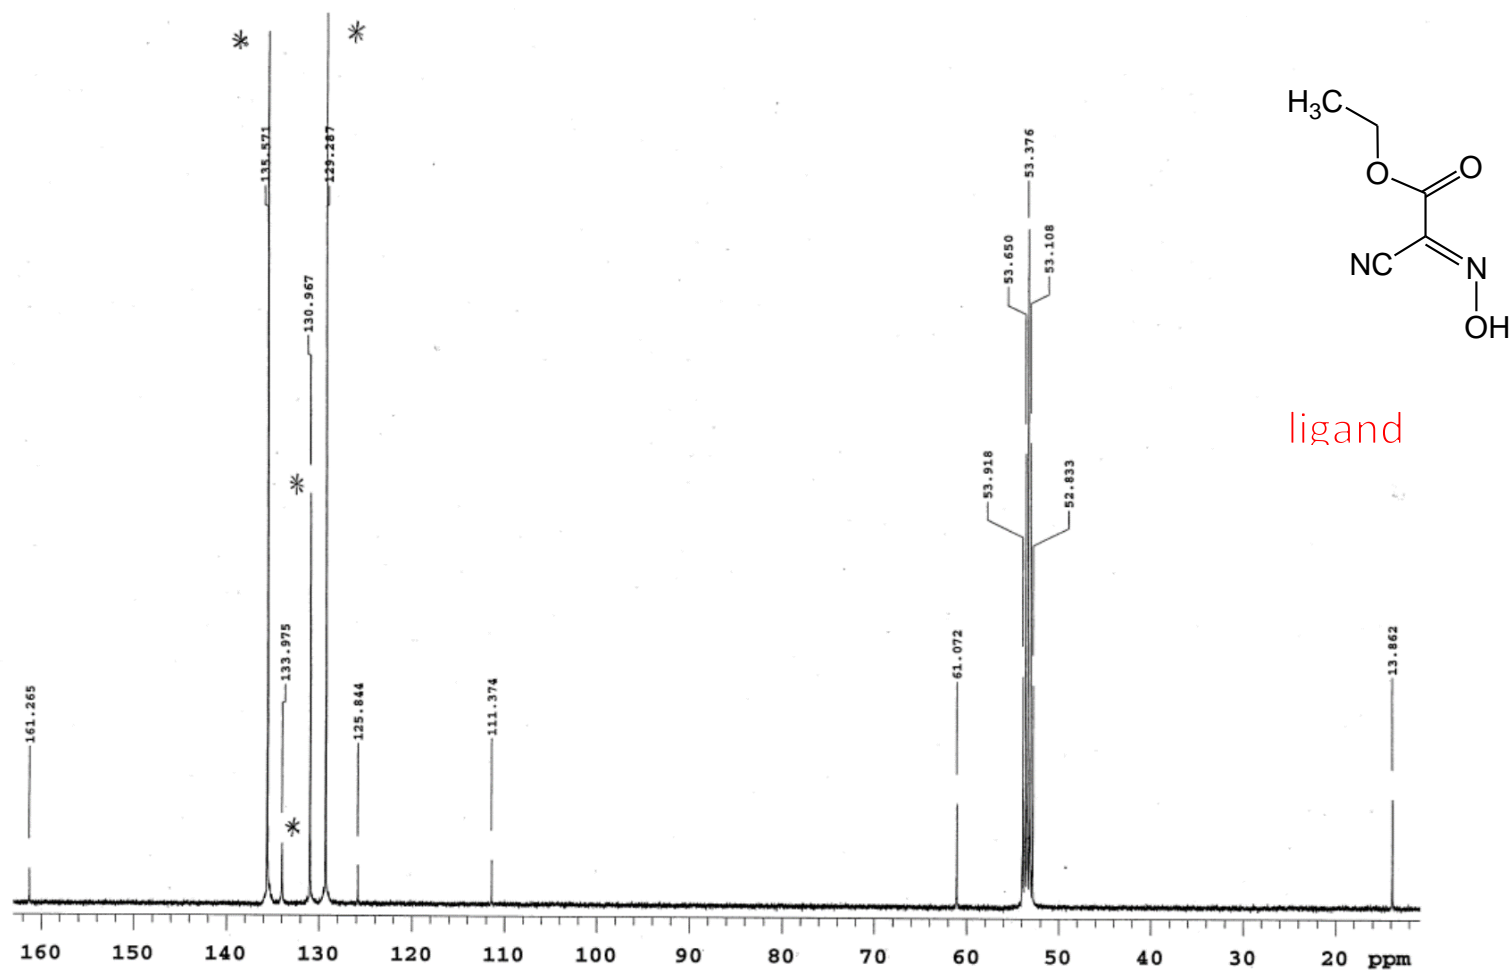

Face-indexed crystal of **SbPh<sub>4</sub>(2PCO)**.

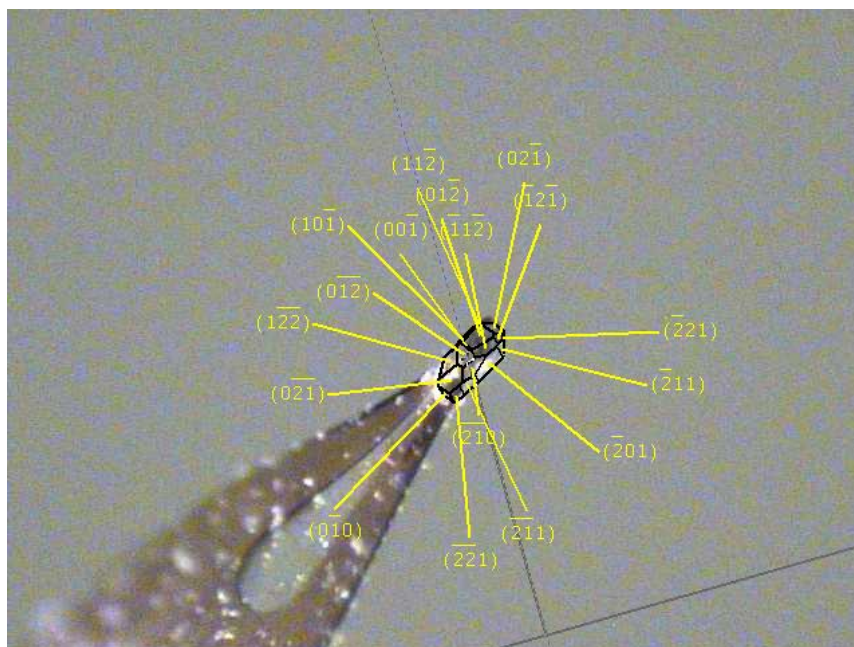

A photograph of a single crystal of a material, likely a metal, with various crystallographic planes labeled. The crystal is elongated and has a complex, faceted shape. Labels include (001), (112), (102), (212), (121), (021), (122), (011), (012), (112), (101), (111), (211), and (112).

Actual videomicroscope images of single crystals of organoantimony(V) compounds used for structures determination.

Face-indexed crystal of **SbPh<sub>4</sub>(3PCO)**.

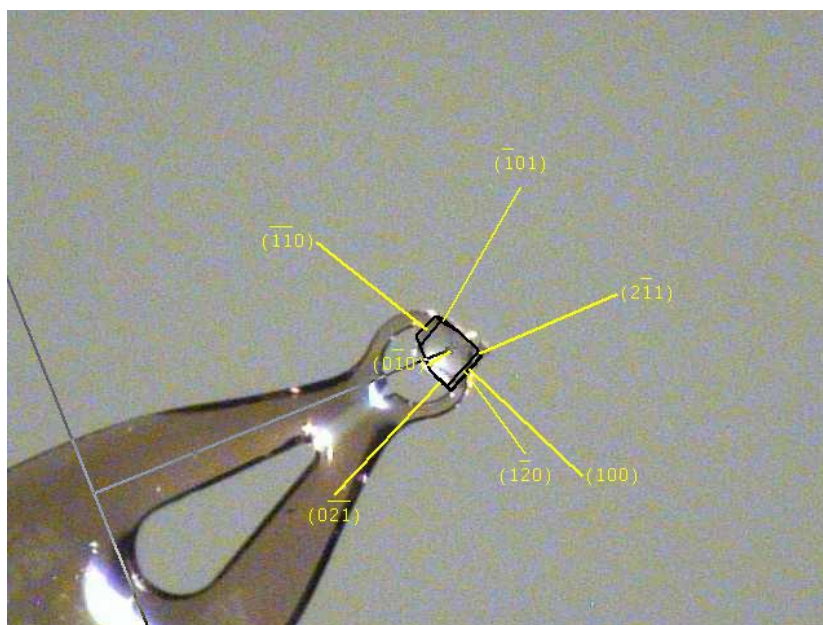

Face-indexed crystal of **SbPh<sub>4</sub>(TCO)**.

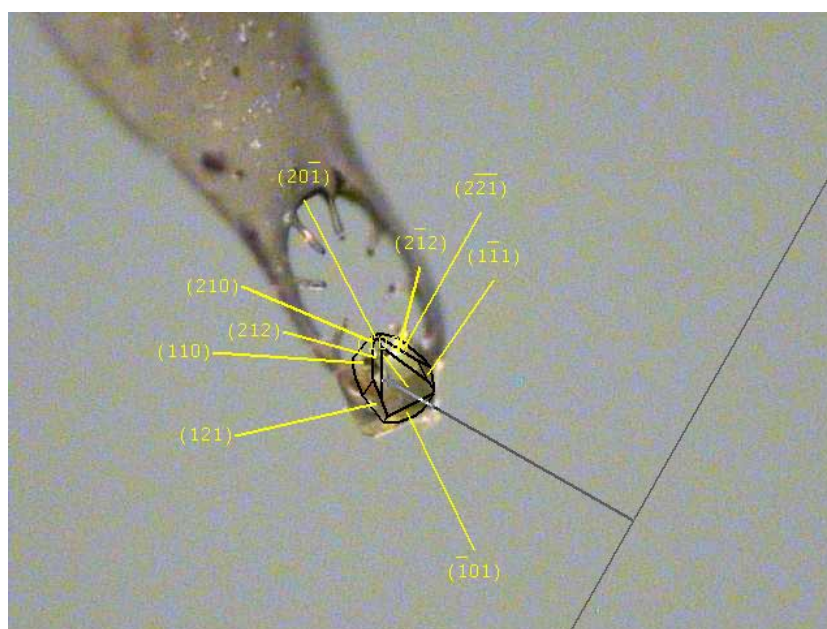



Geometry of coordination polyhedron of Sb(V) in the structure of **SbPh<sub>4</sub>(3PCO)**.

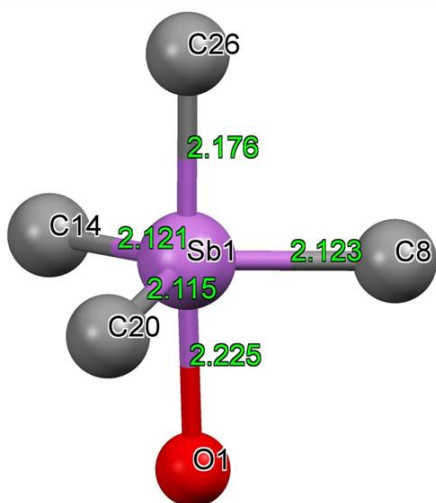

bonds

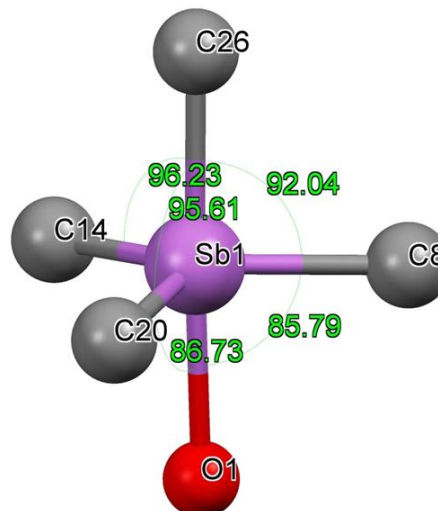

angles

angle C26-Sb1-O1 = 177.38°

Weak C-H...N interactions stabilizing planar geometry of the cyanoxime in the compound with two atoms shown in space-fill representation.

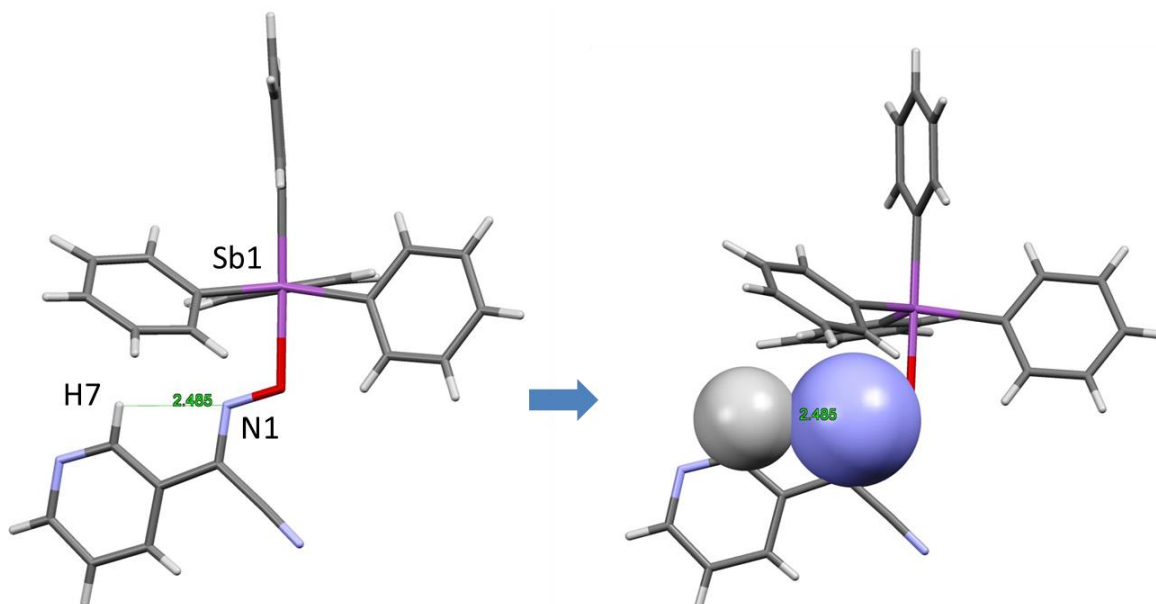

Geometry of coordination polyhedron of Sb(V) in the structure of **SbPh<sub>4</sub>(ACO)**.

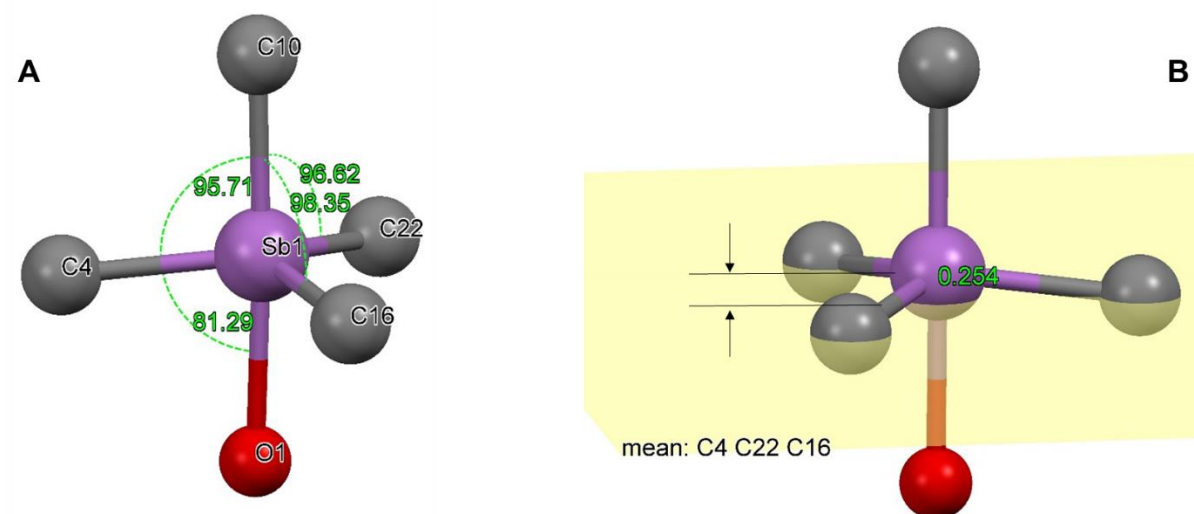

Weak N-H---N interaction stabilizing planar geometry of the cyanoxime in the compound with two atoms shown in space-fill representation emphasizing electrostatic contact.

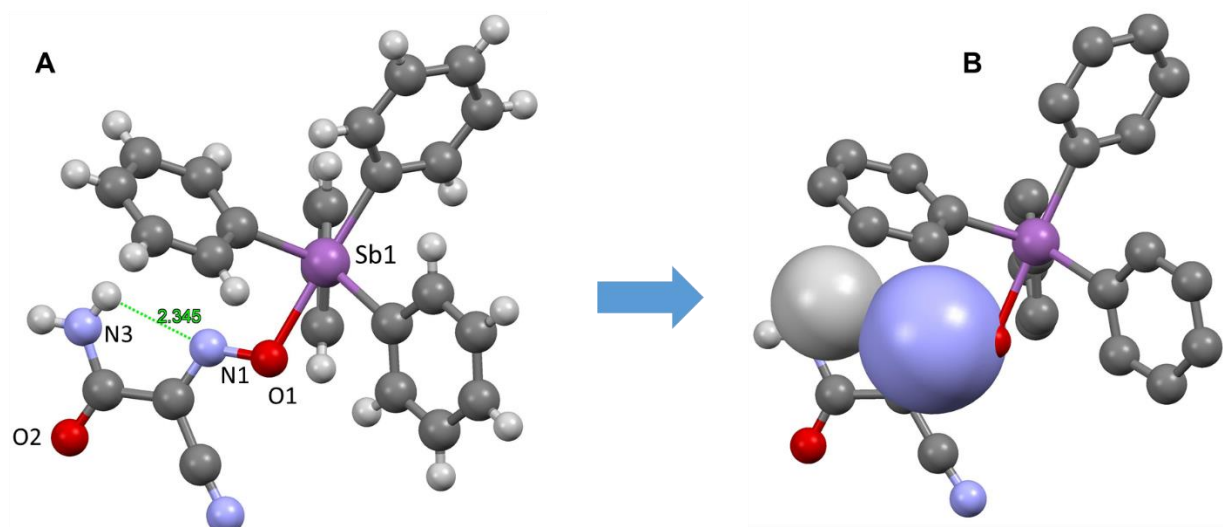



Top panel: molecular structure and principal atoms numbering scheme in the structure of **SbPh<sub>4</sub>(ECO)** showing two crystallographically different molecules **A** and **B**. The H-atoms are omitted for clarity.

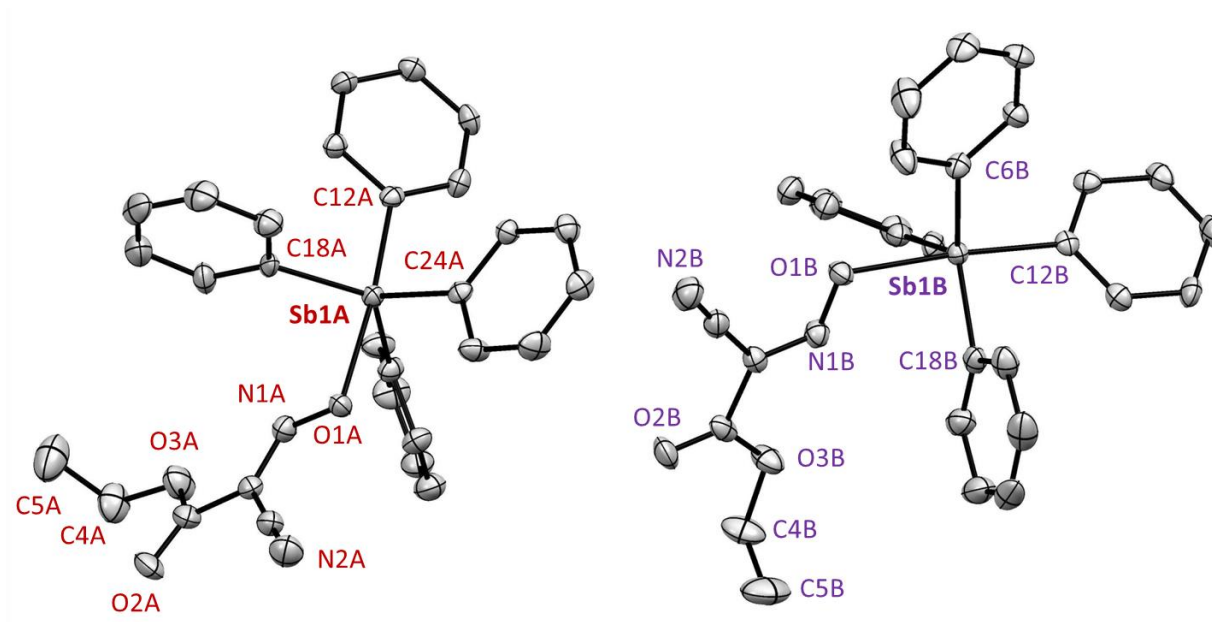

Bottom panel: details of packing of two crystallographically different molecules A and B into the unit cell.

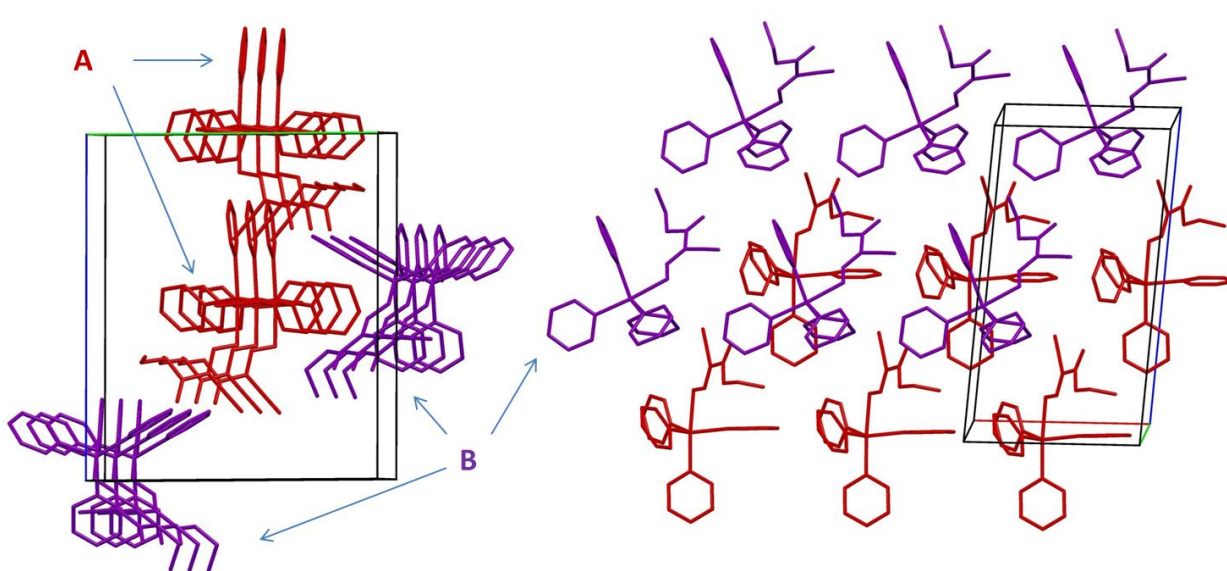

Geometry of coordination polyhedrons of Sb(V) in the structure of **SbPh<sub>4</sub>(ECO)**: top panel for crystallographically independent molecule **A**, bottom panel for independent molecule **B**.

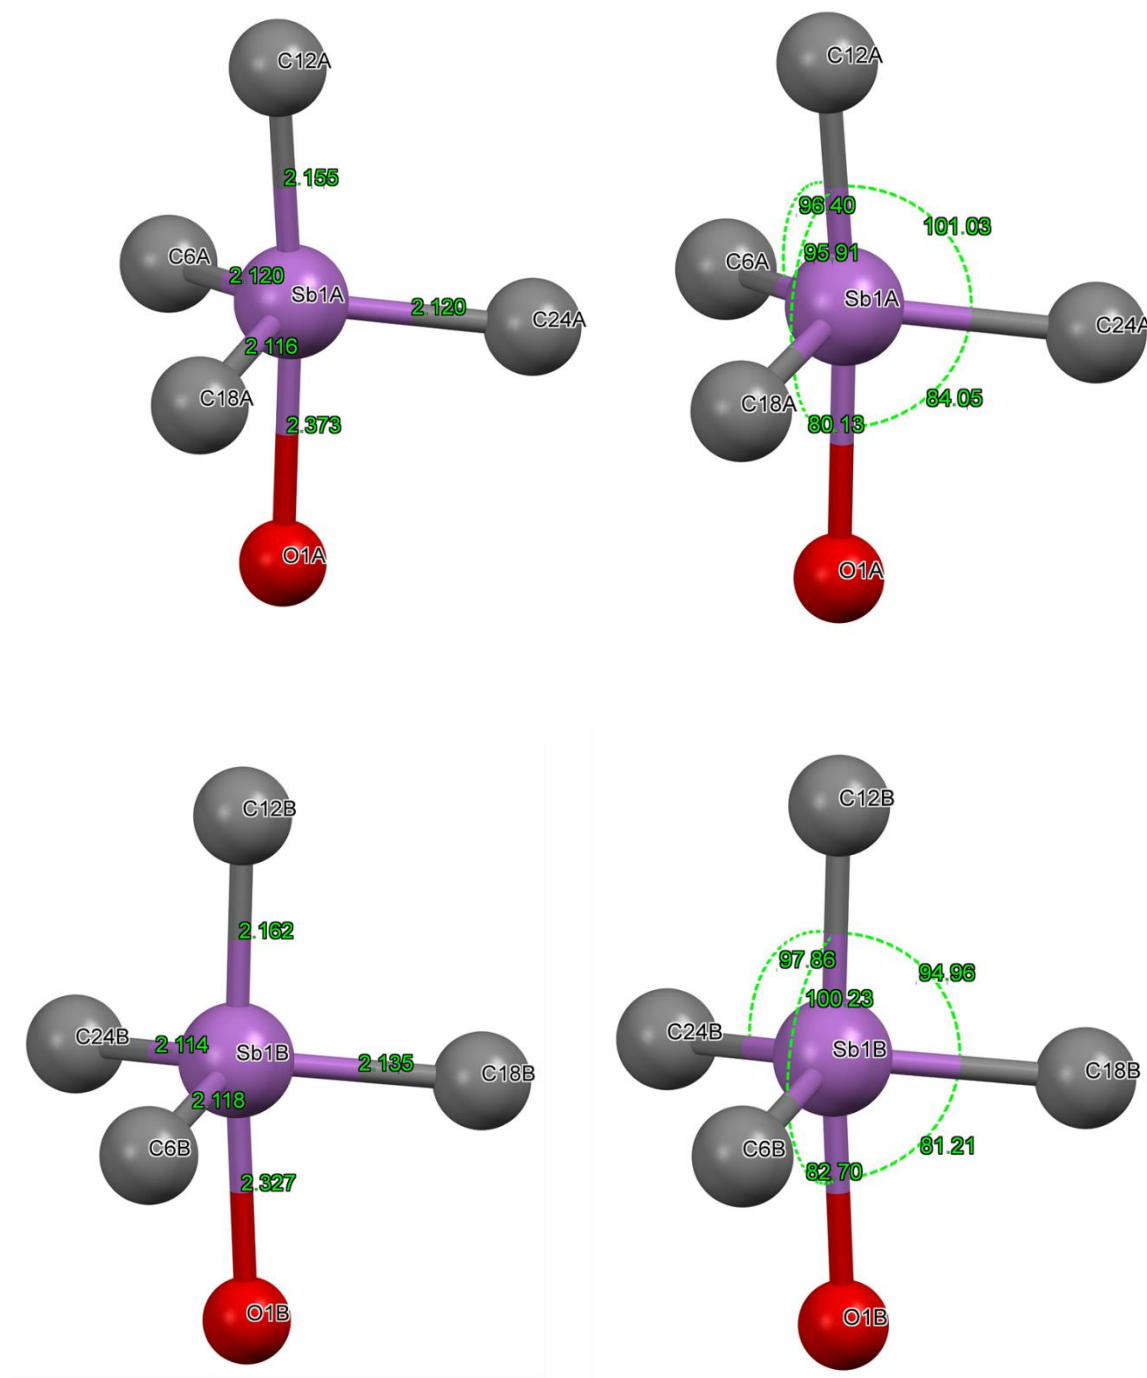

Molecular structure and principal atoms numbering scheme in the structure of **SbPh<sub>4</sub>(MCO)** showing two crystallographically different molecules **A** and **B**. The H-atoms are omitted for clarity.

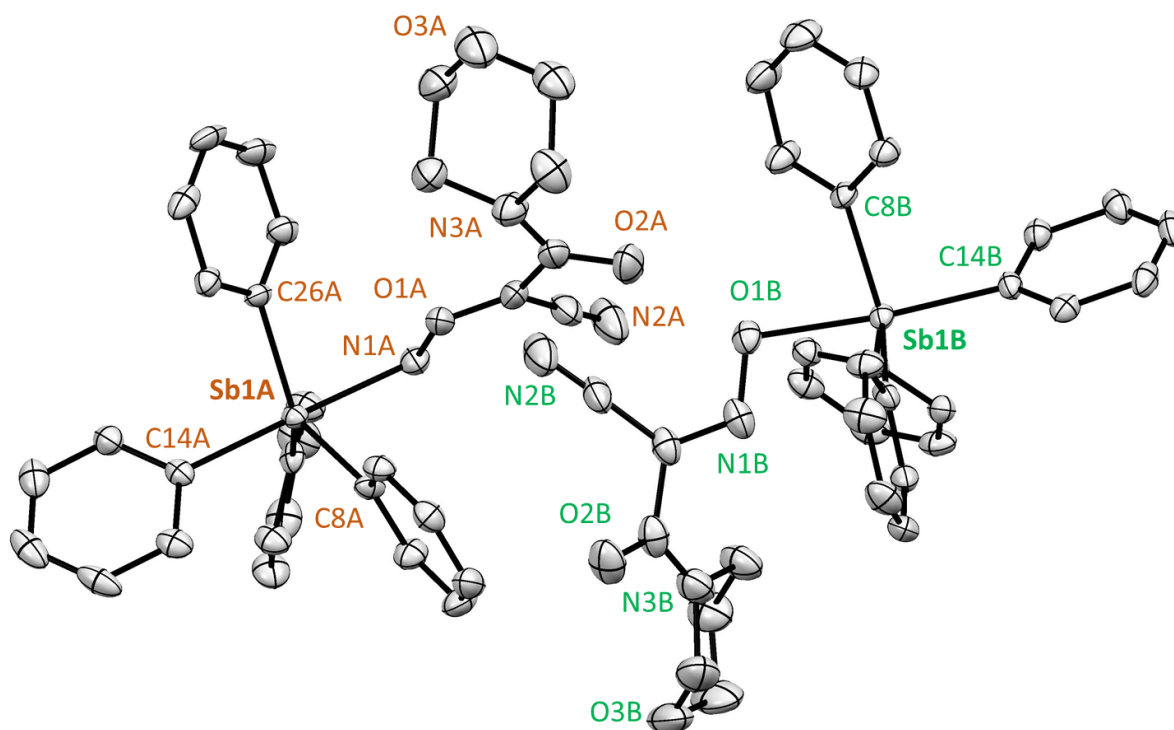

Geometry of coordination polyhedrons of Sb(V) in the structure of **SbPh<sub>4</sub>(MCO)**: top panel for crystallographically independent molecule **A**, bottom panel for independent molecule **B**.

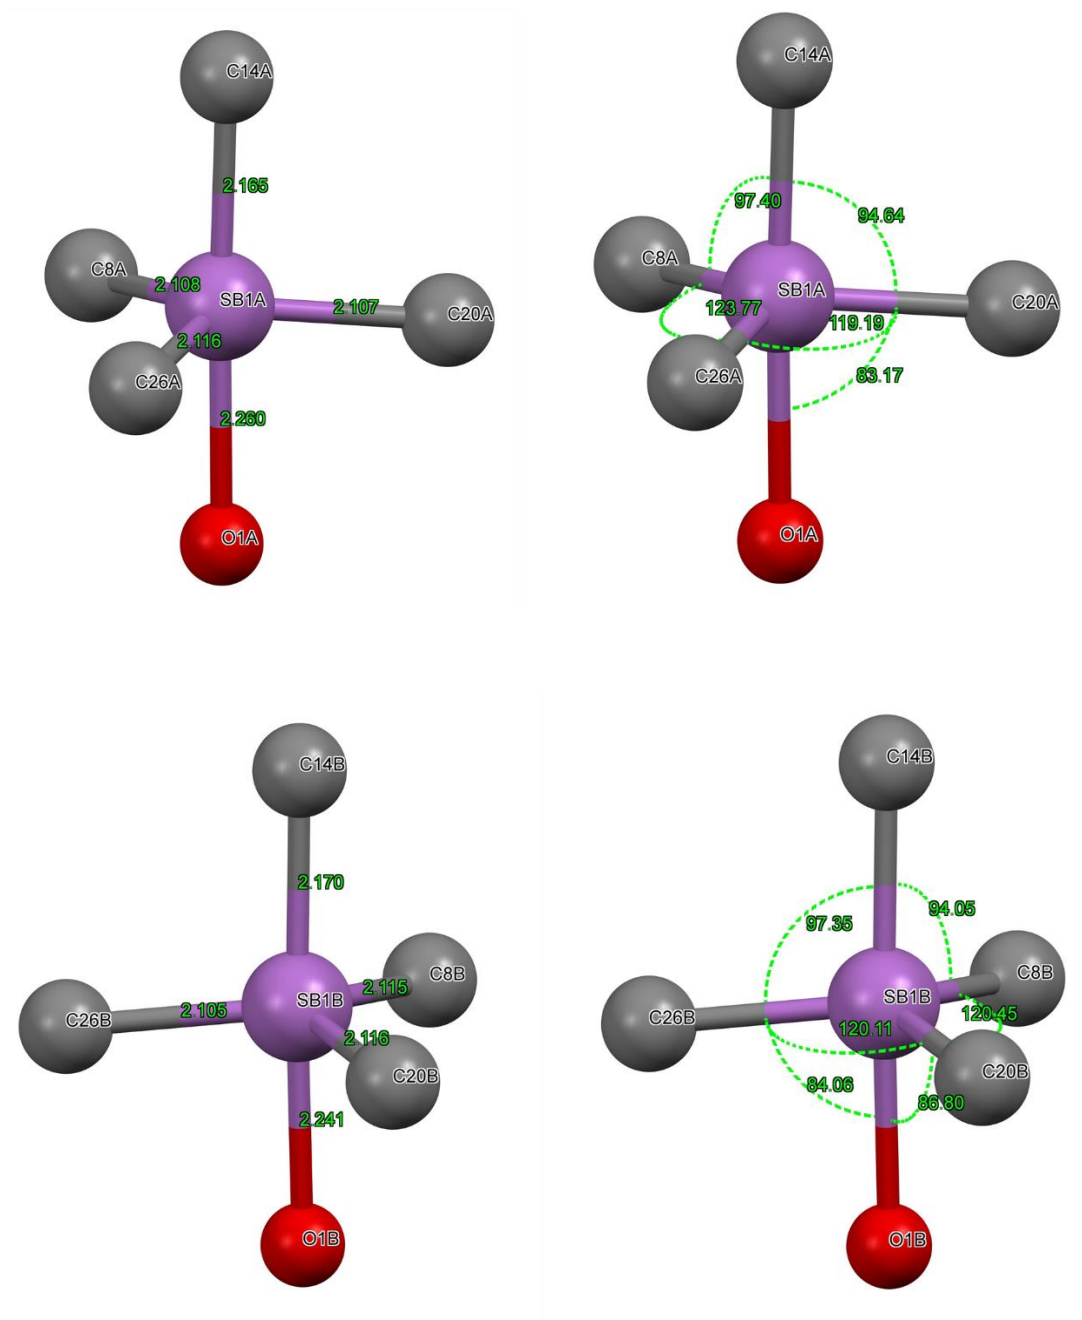

The ASU in the structure of **SbPh<sub>4</sub>(ECO)** with two crystallographically independent molecules **A** and **B** shown in ORTEP representation at 50% thermal ellipsoids probability level.

*Note that the main text presents structure of only one molecule!*

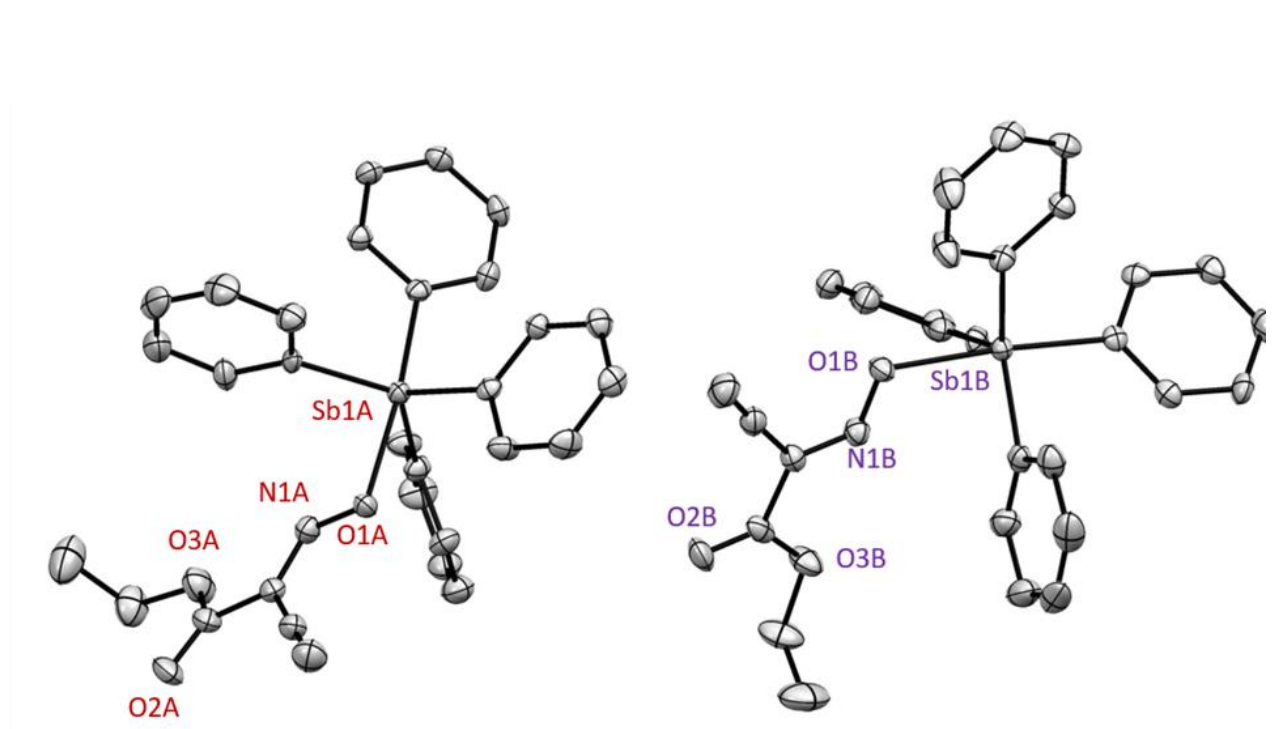

*Note that the main text presents structure of only one molecule!*

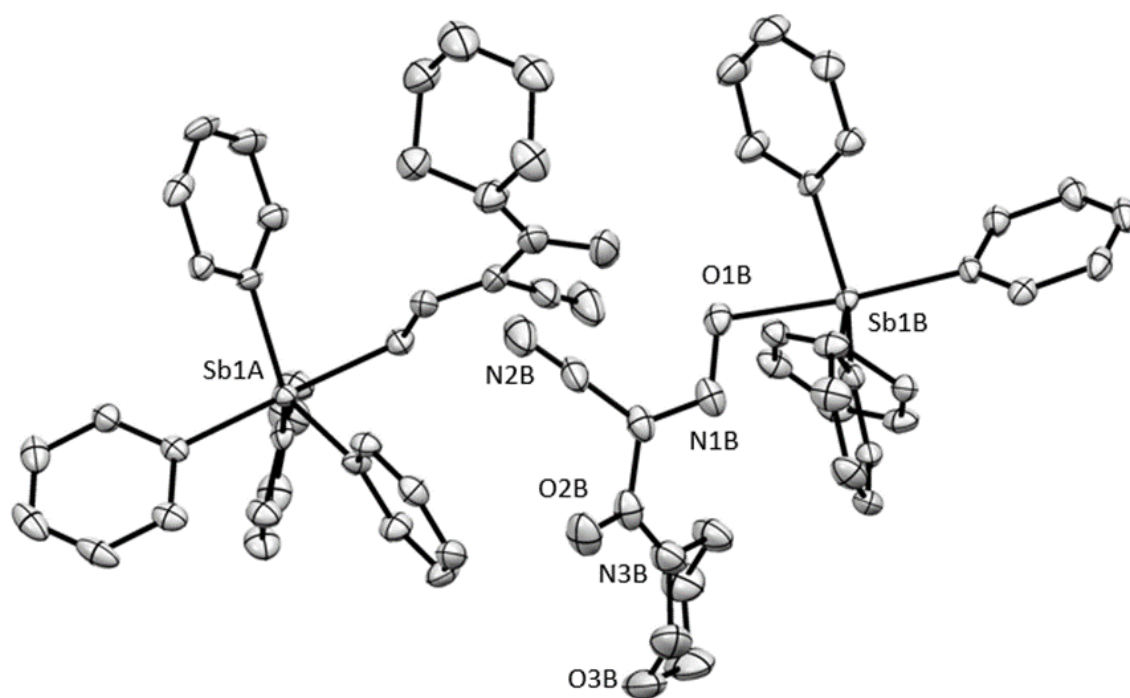

Molecular structure and principal atoms numbering scheme for **SbPh<sub>4</sub>(TCO)**. This is polymorph I which comprised of co-crystallized mixture of two diastereomers: *syn*- and *anti*-.

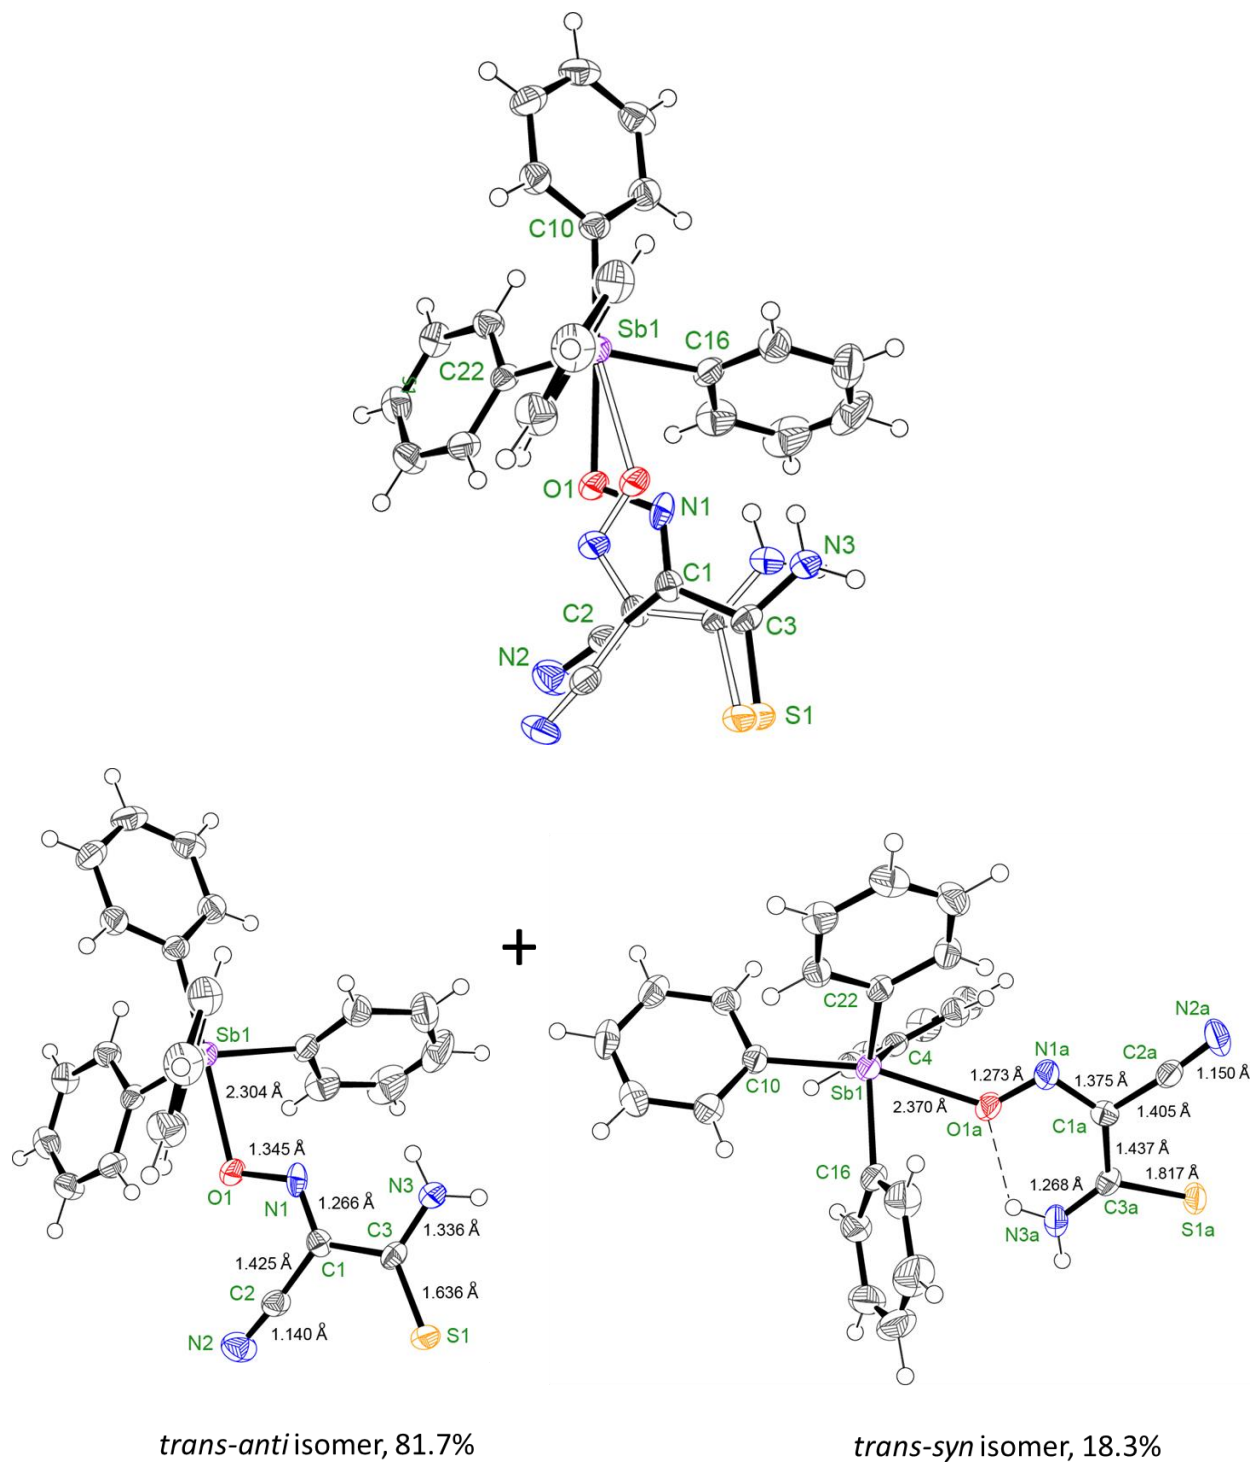

Typical traces of weight loss (green) and heat flow (blue) for **SbPh<sub>4</sub>(ECO)** selected as example showing the melting point of the compound at 144°C followed by its decomposition. Table below summarizes results of TG/DSC measurements for all synthesized tetraphenylantimony(V) cyanoximates.

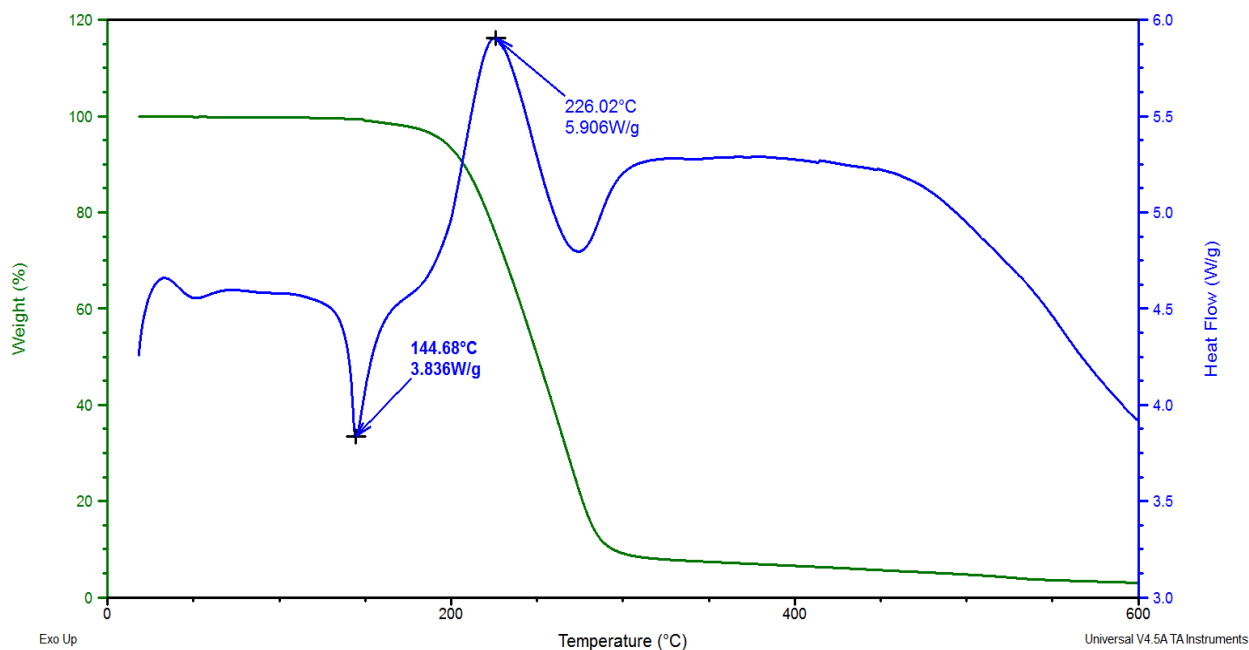

| Compound                                   | Events, temperatures (°C)                   |                                                                                                                      |
|--------------------------------------------|---------------------------------------------|----------------------------------------------------------------------------------------------------------------------|
| SbPh <sub>4</sub> (2PCO)·H <sub>2</sub> O* | weight loss for ~1 H <sub>2</sub> O at ~166 | <i>endo</i> -, melting at 204.2; decomposition, <i>exo</i> - at 249                                                  |
| SbPh <sub>4</sub> (3PCO)                   |                                             | <i>endo</i> -, melting at 146.9; decomposition, <i>exo</i> - at 199                                                  |
| SbPh <sub>4</sub> (4PCO)                   |                                             | <i>endo</i> -, melting at 145.4; decomposition, <i>exo</i> - at 224 and second decomposition, <i>exo</i> - at 283    |
| SbPh <sub>4</sub> (ACO)                    |                                             | <i>endo</i> -, melting at 199.5; decomposition, <i>exo</i> - at 239                                                  |
| SbPh <sub>4</sub> (ECO)                    |                                             | <i>endo</i> -, melting at 144.7; decomposition, <i>exo</i> - at 226                                                  |
| SbPh <sub>4</sub> (MCO)                    |                                             | <i>endo</i> -, melting at 175.2; decomposition, <i>exo</i> - at 238                                                  |
| SbPh <sub>4</sub> (TCO)                    |                                             | <i>endo</i> -, melting at 185.6; decomposition, <i>endo</i> - at 239; and second decomposition, <i>endo</i> - at 286 |
| SbPh <sub>4</sub> (TDCO)                   |                                             | <i>endo</i> -, melting at 148.7; decomposition, <i>exo</i> - at 221                                                  |

\*- X-ray structure gives evidence of anhydrous behavior. Therefore, the complex most likely absorbed moisture from handling.



Observed correlations between acidity of the free cyanoxime HL and chemical shift of the *ipso* carbon in NMR spectra of organoantimony(V) cyanoximates.

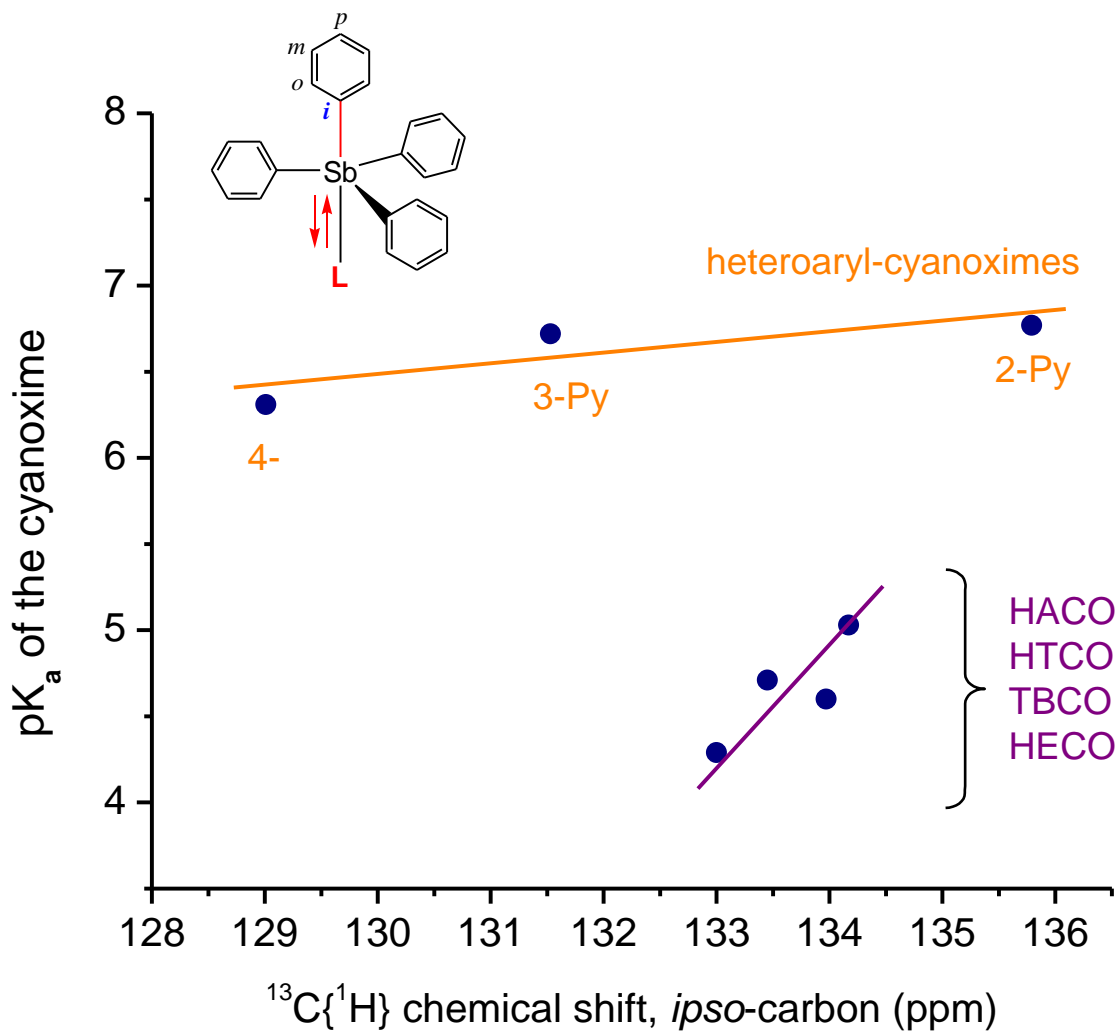

The clearance zones determined by the disc diffusion assay. The black bars represent undiluted, dark grey and light grey - x2 and x4 diluted antibacterial compounds. Controls and test compounds that showed no clearance are not included; p-value: \* $\leq 0.1$ , \*\* $\leq 0.05$

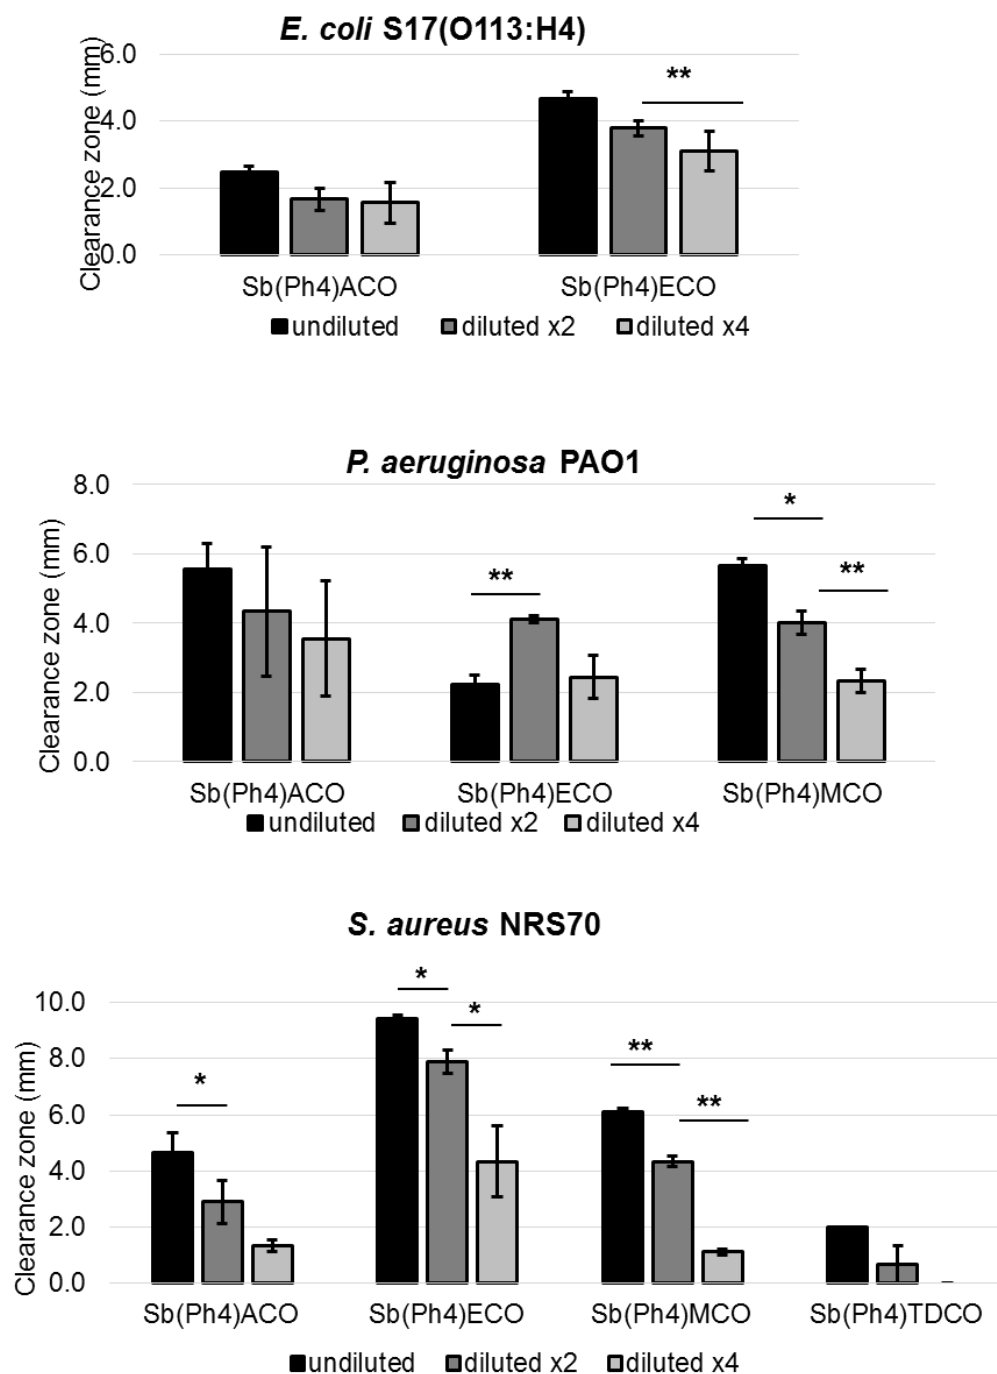

The clearance zones determined by the disc diffusion assay. The black bars represent undiluted, dark grey and light grey - x2 and x4 diluted antibacterial compounds. Controls are not included. Data shown are means  $\pm$  SEM for 3 individual experiments.

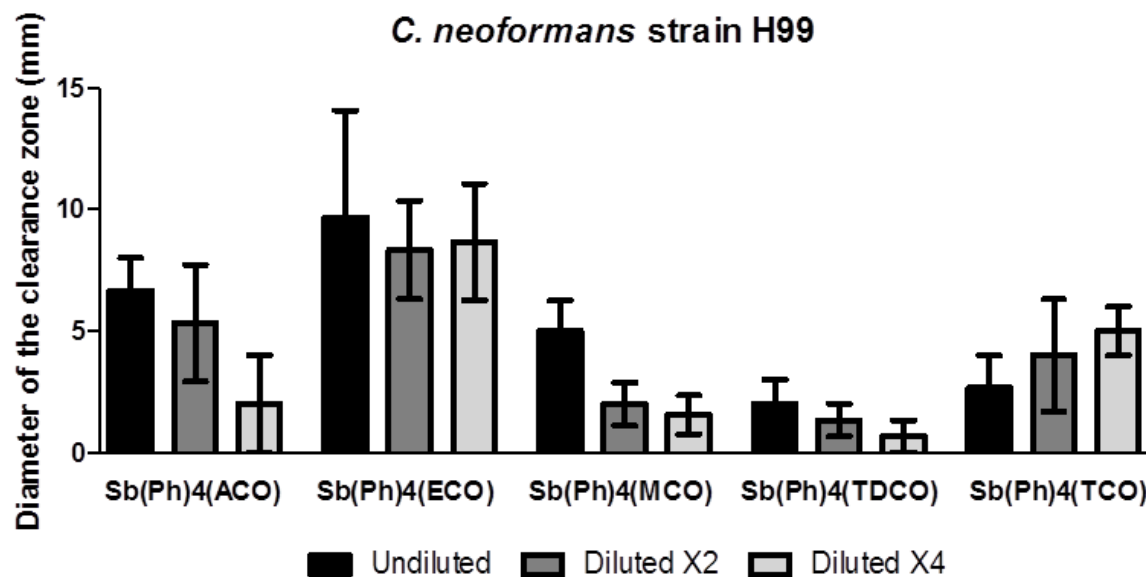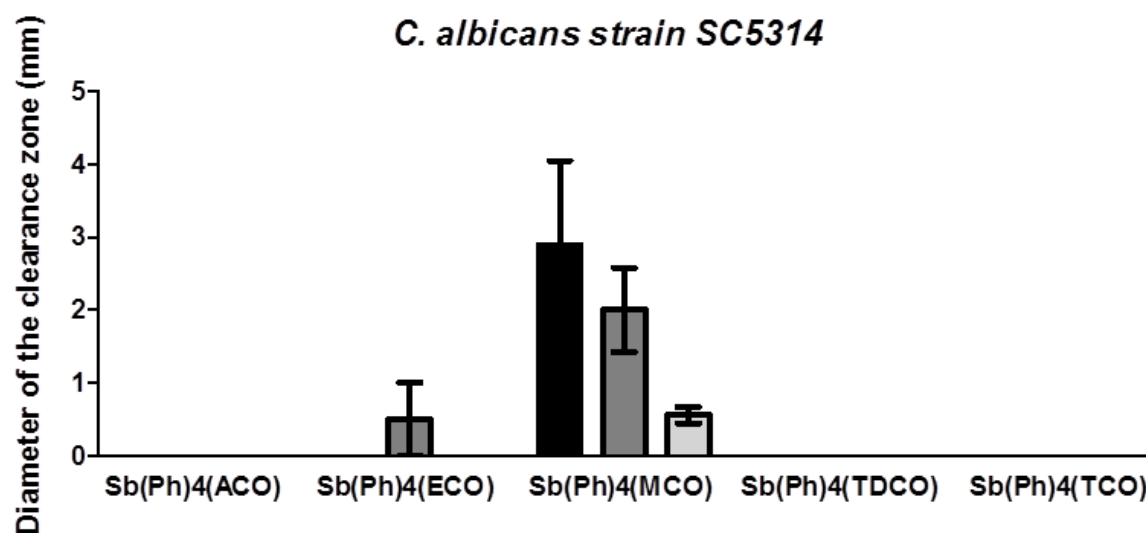

Representative images of discs with undiluted compounds subjected to the disc diffusion assay. Green and orange represent test compounds and ligand controls, respectively. Clearance zones are pointed at with the red arrows.

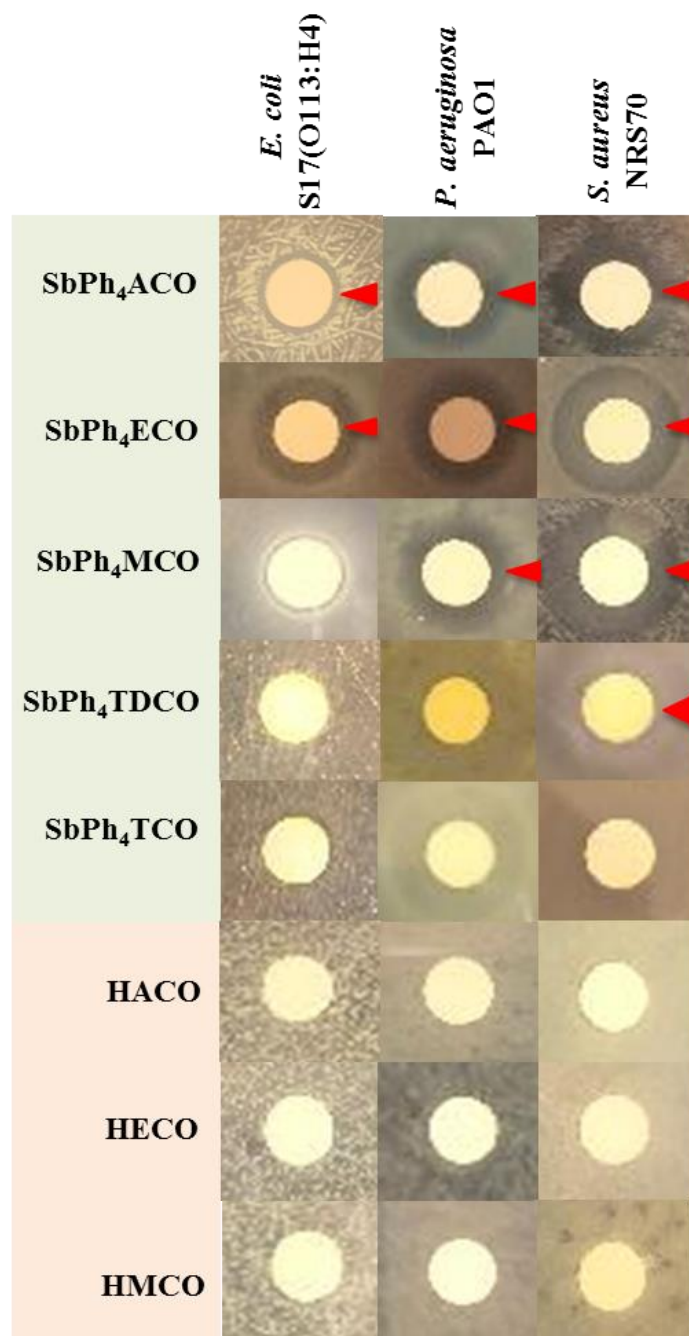

Representative images of discs with undiluted compounds subjected to the disc diffusion assay. Green and orange represent test compounds and ligand controls, respectively. Clearance zones are pointed at with the red arrows.

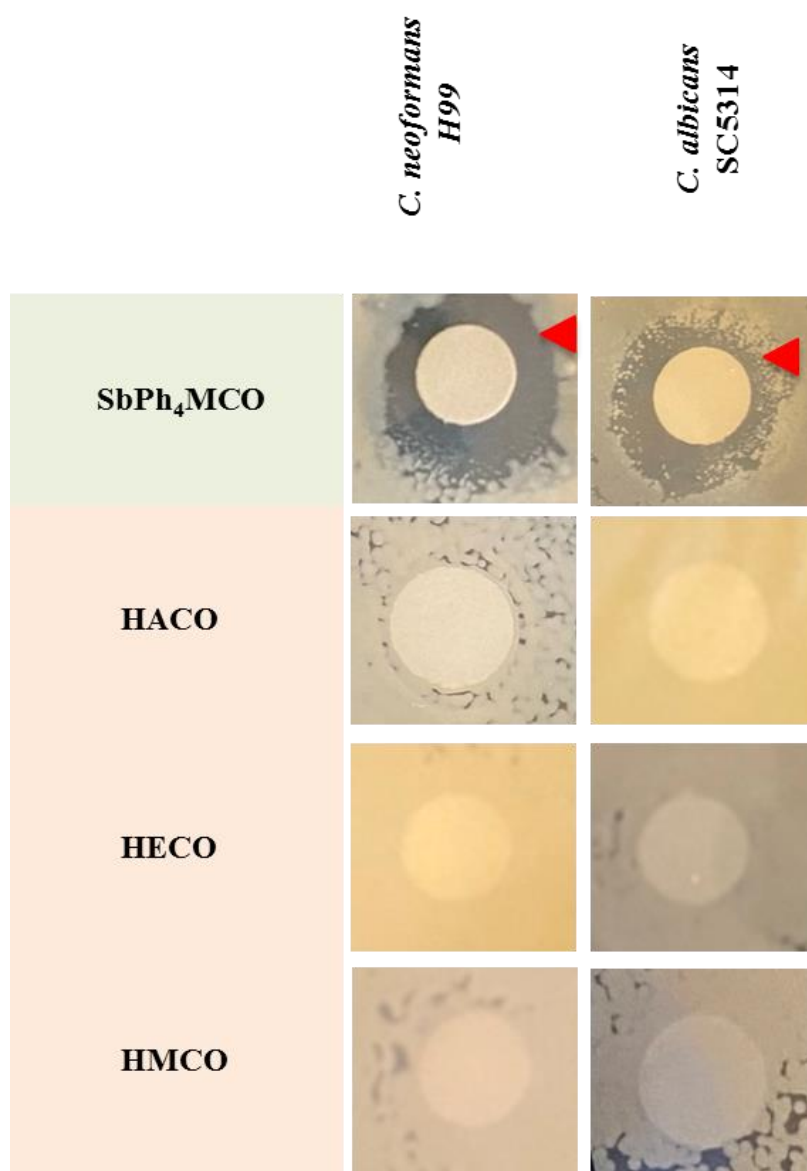

---

## checkCIF/PLATON REPORTS (basic structural check)

---

*Structure factors have been supplied for datablock(s) Sb-Ph4-2pcO*

No syntax errors found.

Please wait while processing ....

[CIF dictionary](#)

[Interpreting this report](#)

[Structure factor report](#)

**Datablock: Sb-Ph4-2PCO**

---

Bond precision: C-C = 0.0044 Å      Wavelength=0.71073

Cell:            a=12.6027(8) b=14.4415(10)      c=14.6694(10)

                alpha=90      beta=104.9644(10) gamma=90

Temperature: 100 K

|                        | Calculated      | Reported        |
|------------------------|-----------------|-----------------|
| Volume                 | 2579.3(3)       | 2579.3(3)       |
| Space group            | P 21/n          | P 21/n          |
| Hall group             | -P 2yn          | -P 2yn          |
| Moiety formula         | C31 H24 N3 O Sb | C31 H24 N3 O Sb |
| Sum formula            | C31 H24 N3 O Sb | C31 H24 N3 O Sb |
| Mr                     | 576.29          | 576.28          |
| Dx, g cm <sup>-3</sup> | 1.484           | 1.484           |
| Z                      | 4               | 4               |
| Mu (mm <sup>-1</sup> ) | 1.098           | 1.098           |
| F000                   | 1160.0          | 1160.0          |
| F000'                  | 1158.02         |                 |
| h, k, lmax             | 15, 18, 18      | 15, 18, 18      |
| Nref                   | 5461            | 5458            |

Tmin,Tmax            0.846,0.912                            0.872,0.949

Tmin'                0.829

Correction method= # Reported T Limits:  
Tmin=0.872 Tmax=0.949 AbsCorr = NUMERICAL

Data completeness= 0.999 Theta(max)= 26.710

R(reflections)= 0.0329(            wR2(reflections)= 0.0792(  
4414)                                5458)

S = 1.039                Npar= 421

The following ALERTS were generated. Each ALERT has the format

**test-name\_ALERT\_alert-type\_alert-level.**

Click on the hyperlinks for more details of the test.

---

### 🟡 Alert level C

|                                   |                                                                  |       |        |
|-----------------------------------|------------------------------------------------------------------|-------|--------|
| <a href="#">PLAT094 ALERT 2 C</a> | Ratio of Maximum / Minimum Residual Density ....                 | 3.47  | Report |
| <a href="#">PLAT245 ALERT 2 C</a> | U(iso) H7                Smaller than U(eq) C7                by | 0.013 | Ang**2 |
| <a href="#">PLAT245 ALERT 2 C</a> | U(iso) H24               Smaller than U(eq) C24               by | 0.012 | Ang**2 |
| <a href="#">PLAT350 ALERT 3 C</a> | Short C-H (X0.96,N1.08A) C22               - H22               . | 0.84  | Ang.   |
| <a href="#">PLAT975 ALERT 2 C</a> | Check Calcd Resid. Dens. 1.06A               From O1             | 0.43  | eA-3   |

---

### 🟢 Alert level G

|                                   |                                                  |    |              |
|-----------------------------------|--------------------------------------------------|----|--------------|
| <a href="#">PLAT164 ALERT 4 G</a> | Nr. of Refined C-H H-Atoms in Heavy-Atom Struct. | 24 | Note         |
| <a href="#">PLAT883 ALERT 1 G</a> | No Info/Value for _atom_sites_solution_primary . |    | Please Do !  |
| <a href="#">PLAT912 ALERT 4 G</a> | Missing # of FCF Reflections Above STh/L= 0.600  | 3  | Note         |
| <a href="#">PLAT965 ALERT 2 G</a> | The SHELXL WEIGHT Optimisation has not Converged |    | Please Check |
| <a href="#">PLAT978 ALERT 2 G</a> | Number C-C Bonds with Positive Residual Density. | 7  | Info         |

---

PLATON version of 04/06/2020; check.def file version of 02/06/2020

## Datablock **Sb-Ph4-2PCO** - ellipsoid plot

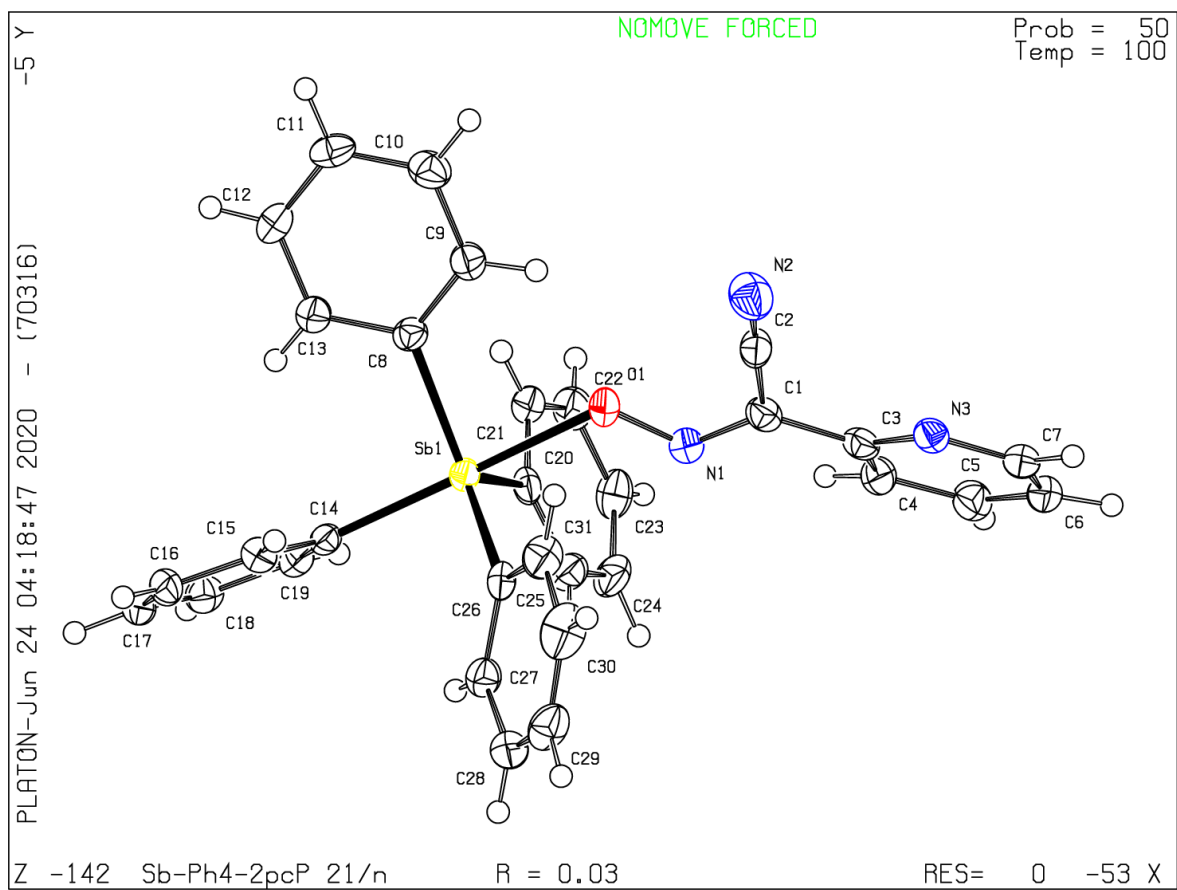



# checkCIF/PLATON (basic structural check)

---

*Structure factors have been supplied for datablock(s) Sb-Ph4-3PCO*

No syntax errors found.

Please wait while processing ....

[CIF dictionary](#)

[Interpreting this report](#)

## [Structure factor report](#)

**Datablock: Sb-Ph4-3PCO**

---

Bond precision: C-C = 0.0036 Å      Wavelength=0.71073

Cell:            a=10.0228(4)    b=10.4598(4)    c=13.8258(5)  
                 alpha=69.324(1) beta=72.086(1) gamma=83.971(1)

Temperature: 296 K

|                | Calculated      | Reported        |
|----------------|-----------------|-----------------|
| Volume         | 1290.34(9)      | 1290.34(9)      |
| Space group    | P -1            | P -1            |
| Hall group     | -P 1            | -P 1            |
| Moiety formula | C31 H24 N3 O Sb | C31 H24 N3 O Sb |
| Sum formula    | C31 H24 N3 O Sb | C31 H24 N3 O Sb |
| Mr             | 576.29          | 576.28          |
| Dx, g cm-3     | 1.483           | 1.483           |
| Z              | 2               | 2               |
| Mu (mm-1)      | 1.098           | 1.098           |
| F000           | 580.0           | 580.0           |
| F000'          | 579.01          |                 |
| h, k, lmax     | 13, 13, 18      | 13, 13, 18      |
| Nref           | 6224            | 6218            |
| Tmin, Tmax     | 0.822, 0.897    | 0.697, 0.747    |
| Tmin'          | 0.798           |                 |

Correction method= # Reported T Limits:

Tmin=0.697 Tmax=0.747 AbsCorr = MULTI-SCAN

Data completeness= 0.999 Theta(max)= 27.999

R(reflections)= 0.0242( 5636) wR2(reflections)= 0.0585( 6218)

S = 1.055 Npar= 421

---

The following ALERTS were generated. Each ALERT has the format

**test-name\_ALERT\_alert-type\_alert-level.**

Click on the hyperlinks for more details of the test.

---

### Alert level C

|                                   |                         |                    |                                 |      |             |
|-----------------------------------|-------------------------|--------------------|---------------------------------|------|-------------|
| <a href="#">PLAT230 ALERT 2 C</a> | Hirshfeld Test Diff for | C11                | --C12                           | .    | 6.5 s.u.    |
| <a href="#">PLAT241 ALERT 2 C</a> | High                    | 'MainMol'          | Ueq as Compared to Neighbors of |      | C5 Check    |
| <a href="#">PLAT242 ALERT 2 C</a> | Low                     | 'MainMol'          | Ueq as Compared to Neighbors of |      | C3 Check    |
| <a href="#">PLAT350 ALERT 3 C</a> | Short                   | C-H (X0.96,N1.08A) | C4                              | - H4 | . 0.83 Ang. |

#### And 2 other PLAT350 Alerts

|                                   |                                         |                    |     |       |             |
|-----------------------------------|-----------------------------------------|--------------------|-----|-------|-------------|
| <a href="#">PLAT350 ALERT 3 C</a> | Short                                   | C-H (X0.96,N1.08A) | C12 | - H12 | . 0.84 Ang. |
| <a href="#">PLAT350 ALERT 3 C</a> | Short                                   | C-H (X0.96,N1.08A) | C19 | - H19 | . 0.84 Ang. |
| <a href="#">PLAT911 ALERT 3 C</a> | Missing FCF Refl Between Thmin & STh/L= | 0.600              |     |       | 2 Report    |

---

### Alert level G

|                                   |                                                  |                     |
|-----------------------------------|--------------------------------------------------|---------------------|
| <a href="#">PLAT154 ALERT 1 G</a> | The s.u.'s on the Cell Angles are Equal ..(Note) | 0.001 Degree        |
| <a href="#">PLAT164 ALERT 4 G</a> | Nr. of Refined C-H H-Atoms in Heavy-Atom Struct. | 24 Note             |
| <a href="#">PLAT230 ALERT 2 G</a> | Hirshfeld Test Diff for                          | C1 --C2 . 6.2 s.u.  |
| <a href="#">PLAT232 ALERT 2 G</a> | Hirshfeld Test Diff (M-X)                        | Sb1 --O1 . 6.1 s.u. |
| <a href="#">PLAT883 ALERT 1 G</a> | No Info/Value for _atom_sites_solution_primary   | . Please Do !       |
| <a href="#">PLAT912 ALERT 4 G</a> | Missing # of FCF Reflections Above STh/L=        | 0.600 4 Note        |
| <a href="#">PLAT933 ALERT 2 G</a> | Number of OMIT Records in Embedded .res File ... | 4 Note              |
| <a href="#">PLAT941 ALERT 3 G</a> | Average HKL Measurement Multiplicity .....       | 2.9 Low             |
| <a href="#">PLAT965 ALERT 2 G</a> | The SHELXL WEIGHT Optimisation has not Converged | Please Check        |
| <a href="#">PLAT978 ALERT 2 G</a> | Number C-C Bonds with Positive Residual Density. | 12 Info             |

---

PLATON version of 04/06/2020; check.def file version of 02/06/2020

## Datablock Sb-Ph4-3PCO - ellipsoid plot

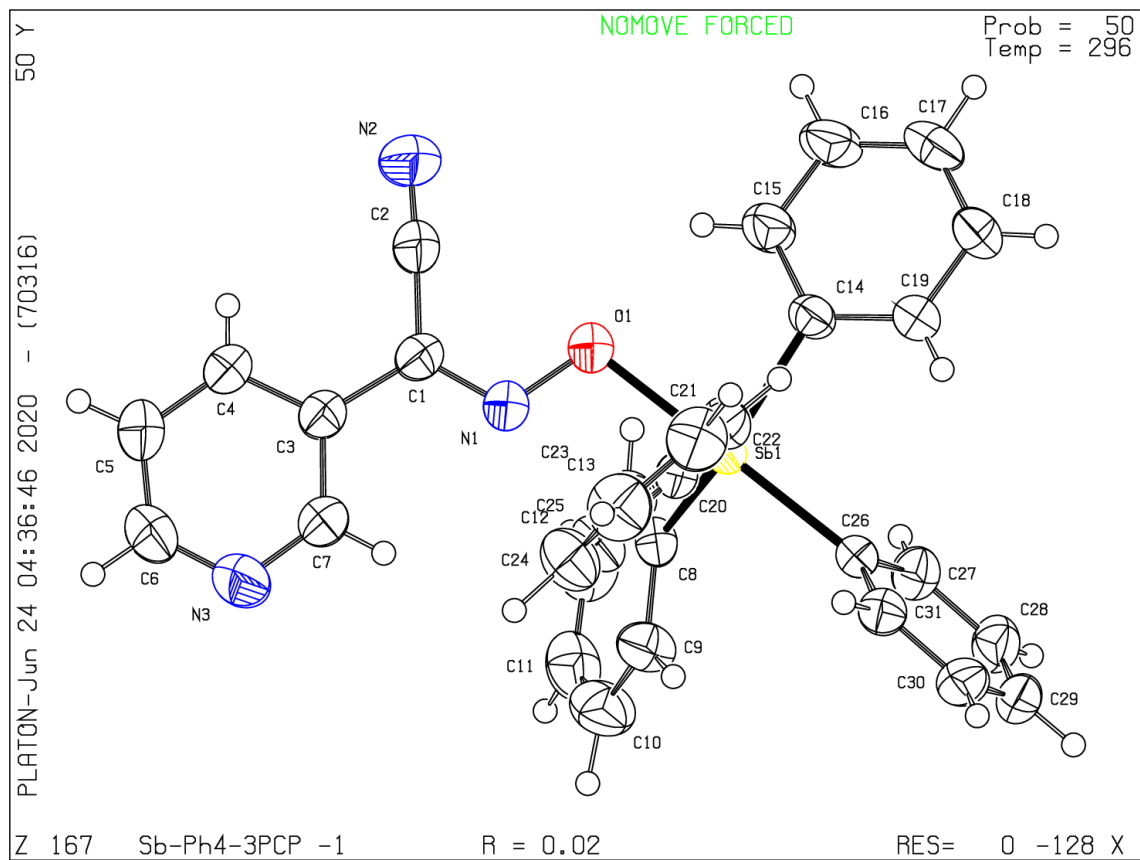

# checkCIF/PLATON (basic structural check)

---

*Structure factors have been supplied for datablock(s) Sb-Ph4-4PCO*

No syntax errors found.

Please wait while processing ....

[CIF dictionary](#)

[Interpreting this report](#)

## [Structure factor report](#)

**Datablock: Sb-Ph4-4PCO**

---

Bond precision: C-C = 0.0031 Å      Wavelength=0.71073

Cell:            a=15.3352 (10) b=9.7848 (6)      c=19.6576 (9)

                 alpha=90      beta=119.272 (4) gamma=90

Temperature: 120 K

|                        | Calculated      | Reported        |
|------------------------|-----------------|-----------------|
| Volume                 | 2573.0 (3)      | 2573.0 (3)      |
| Space group            | P 21/c          | P 21/c          |
| Hall group             | -P 2ybc         | -P 2ybc         |
| Moiety formula         | C31 H24 N3 O Sb | C31 H24 N3 O Sb |
| Sum formula            | C31 H24 N3 O Sb | C31 H24 N3 O Sb |
| Mr                     | 576.29          | 576.28          |
| Dx, g cm <sup>-3</sup> | 1.488           | 1.428           |
| Z                      | 4               | 4               |
| Mu (mm <sup>-1</sup> ) | 1.101           | 1.099           |
| F000                   | 1160.0          | 1068.0          |
| F000'                  | 1158.02         |                 |
| h, k, lmax             | 23, 15, 30      | 22, 14, 29      |
| Nref                   | 9749            | 9309            |
| Tmin, Tmax             | 0.730, 0.803    | 0.683, 0.880    |
| Tmin'                  | 0.514           |                 |

Correction method= # Reported T Limits:

Tmin=0.683 Tmax=0.880 AbsCorr = NUMERICAL

Data completeness= 0.955 Theta(max)= 33.082

R(reflections)= 0.0286( 7879) wR2(reflections)= 0.0678( 9309)

S = 1.098 Npar= 417

---

The following ALERTS were generated. Each ALERT has the format

**test-name\_ALERT\_alert-type\_alert-level.**

Click on the hyperlinks for more details of the test.

---

### 🟡 Alert level C

[DENS001 ALERT 1 C](#) The ratio of the submitted crystal density and that calculated from the formula is outside the range 0.99 <> 1.01

Crystal density given = 1.428

Calculated crystal density = 1.488

|                                   |                                                  |              |
|-----------------------------------|--------------------------------------------------|--------------|
| <a href="#">PLAT046 ALERT 1 C</a> | Reported Z, MW and D(calc) are Inconsistent .... | 1.488 Check  |
| <a href="#">PLAT068 ALERT 1 C</a> | Reported F000 Differs from Calcd (or Missing)... | Please Check |
| <a href="#">PLAT094 ALERT 2 C</a> | Ratio of Maximum / Minimum Residual Density .... | 2.99 Report  |
| <a href="#">PLAT971 ALERT 2 C</a> | Check Calcd Resid. Dens. 1.12A From C21          | 1.73 eA-3    |

---

### 🟢 Alert level G

|                                   |                                                  |              |
|-----------------------------------|--------------------------------------------------|--------------|
| <a href="#">PLAT128 ALERT 4 G</a> | Alternate Setting for Input Space Group P21/c    | P21/n Note   |
| <a href="#">PLAT164 ALERT 4 G</a> | Nr. of Refined C-H H-Atoms in Heavy-Atom Struct. | 23 Note      |
| <a href="#">PLAT232 ALERT 2 G</a> | Hirshfeld Test Diff (M-X) Sb1 --O1 .             | 5.3 s.u.     |
| <a href="#">PLAT883 ALERT 1 G</a> | No Info/Value for _atom_sites_solution_primary . | Please Do !  |
| <a href="#">PLAT912 ALERT 4 G</a> | Missing # of FCF Reflections Above STh/L= 0.600  | 400 Note     |
| <a href="#">PLAT933 ALERT 2 G</a> | Number of OMIT Records in Embedded .res File ... | 10 Note      |
| <a href="#">PLAT941 ALERT 3 G</a> | Average HKL Measurement Multiplicity .....       | 4.5 Low      |
| <a href="#">PLAT965 ALERT 2 G</a> | The SHELXL WEIGHT Optimisation has not Converged | Please Check |
| <a href="#">PLAT978 ALERT 2 G</a> | Number C-C Bonds with Positive Residual Density. | 15 Info      |

---

Datablock **Sb-Ph4-4PCO** - ellipsoid plot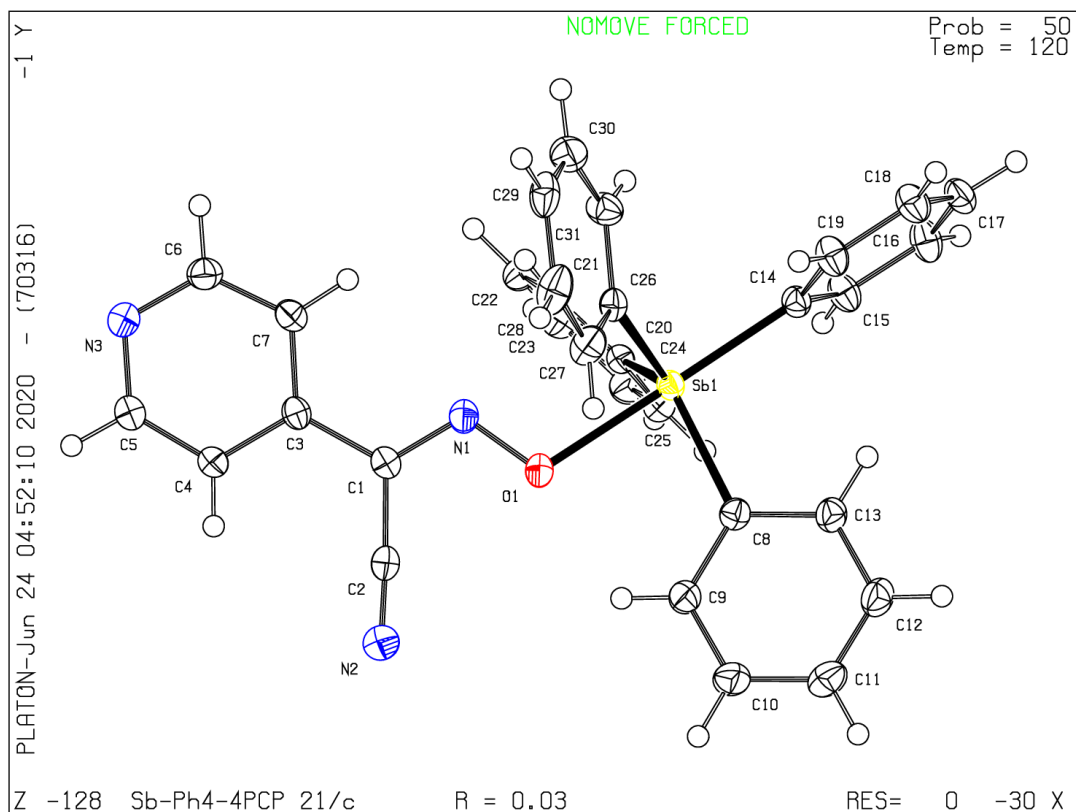

# checkCIF/PLATON (basic structural check)

---

*Structure factors have been supplied for datablock(s) Sb-pH4-ACO*

No syntax errors found.

Please wait while processing ....

[CIF dictionary](#)

[Interpreting this report](#)

## [Structure factor report](#)

### Datablock: **Sb-Ph4-ACO**

---

Bond precision: C-C = 0.0034 Å      Wavelength=0.71073

Cell:            a=14.8336(8) b=9.9060(6)      c=17.3977(10)

                 alpha=90      beta=112.713(1) gamma=90

Temperature: 120 K

|                        | Calculated       | Reported         |
|------------------------|------------------|------------------|
| Volume                 | 2358.2(2)        | 2358.2(2)        |
| Space group            | P 21/c           | P 21/c           |
| Hall group             | -P 2ybc          | -P 2ybc          |
| Moiety formula         | C27 H22 N3 O2 Sb | C27 H22 N3 O2 Sb |
| Sum formula            | C27 H22 N3 O2 Sb | C27 H22 N3 O2 Sb |
| Mr                     | 542.24           | 542.22           |
| Dx, g cm <sup>-3</sup> | 1.527            | 1.527            |
| Z                      | 4                | 4                |
| Mu (mm <sup>-1</sup> ) | 1.199            | 1.199            |
| F000                   | 1088.0           | 1088.0           |
| F000'                  | 1086.02          |                  |
| h, k, lmax             | 22, 15, 26       | 22, 15, 26       |
| Nref                   | 8912             | 8465             |
| Tmin, Tmax             | 0.864, 0.901     | 0.648, 0.953     |
| Tmin'                  | 0.839            |                  |

Correction method= # Reported T Limits:

Tmin=0.648 Tmax=0.953 AbsCorr = NUMERICAL

Data completeness= 0.950 Theta(max)= 33.019

R(reflections)= 0.0288(      wR2(reflections)= 0.0726(  
7070)                      8465)

S = 1.172                  Npar= 386

---

The following ALERTS were generated. Each ALERT has the format

**test-name\_ALERT\_alert-type\_alert-level.**

Click on the hyperlinks for more details of the test.

---

### Alert level B

|                                   |                                                  |         |
|-----------------------------------|--------------------------------------------------|---------|
| <a href="#">PLAT919 ALERT 3 B</a> | Reflection # Likely Affected by the Beamstop ... | 1 Check |
| <a href="#">PLAT934 ALERT 3 B</a> | Number of (Iobs-Icalc)/Sigma(W) >10 Outliers ..  | 8 Check |

---

### Alert level C

|                                   |                                                                                     |              |
|-----------------------------------|-------------------------------------------------------------------------------------|--------------|
| <a href="#">PLAT094 ALERT 2 C</a> | Ratio of Maximum / Minimum Residual Density ....                                    | 2.71 Report  |
| <a href="#">PLAT420 ALERT 2 C</a> | D-H Without Acceptor                  N3                  --H2N3                  . | Please Check |
| <a href="#">PLAT971 ALERT 2 C</a> | Check Calcd Resid. Dens.    2.26A                  From C5                          | 1.62 eA-3    |

---

### Alert level G

|                                   |                                                  |              |
|-----------------------------------|--------------------------------------------------|--------------|
| <a href="#">PLAT164 ALERT 4 G</a> | Nr. of Refined C-H H-Atoms in Heavy-Atom Struct. | 20 Note      |
| <a href="#">PLAT720 ALERT 4 G</a> | Number of Unusual/Non-Standard Labels .....      | 2 Note       |
| <a href="#">PLAT883 ALERT 1 G</a> | No Info/Value for _atom_sites_solution_primary . | Please Do !  |
| <a href="#">PLAT912 ALERT 4 G</a> | Missing # of FCF Reflections Above STh/L= 0.600  | 447 Note     |
| <a href="#">PLAT941 ALERT 3 G</a> | Average HKL Measurement Multiplicity .....       | 4.5 Low      |
| <a href="#">PLAT965 ALERT 2 G</a> | The SHELXL WEIGHT Optimisation has not Converged | Please Check |
| <a href="#">PLAT978 ALERT 2 G</a> | Number C-C Bonds with Positive Residual Density. | 4 Info       |

---



PLATON version of 04/06/2020; check.def file version of 02/06/2020

## Datablock **Sb-Ph4-ACO** - ellipsoid plot

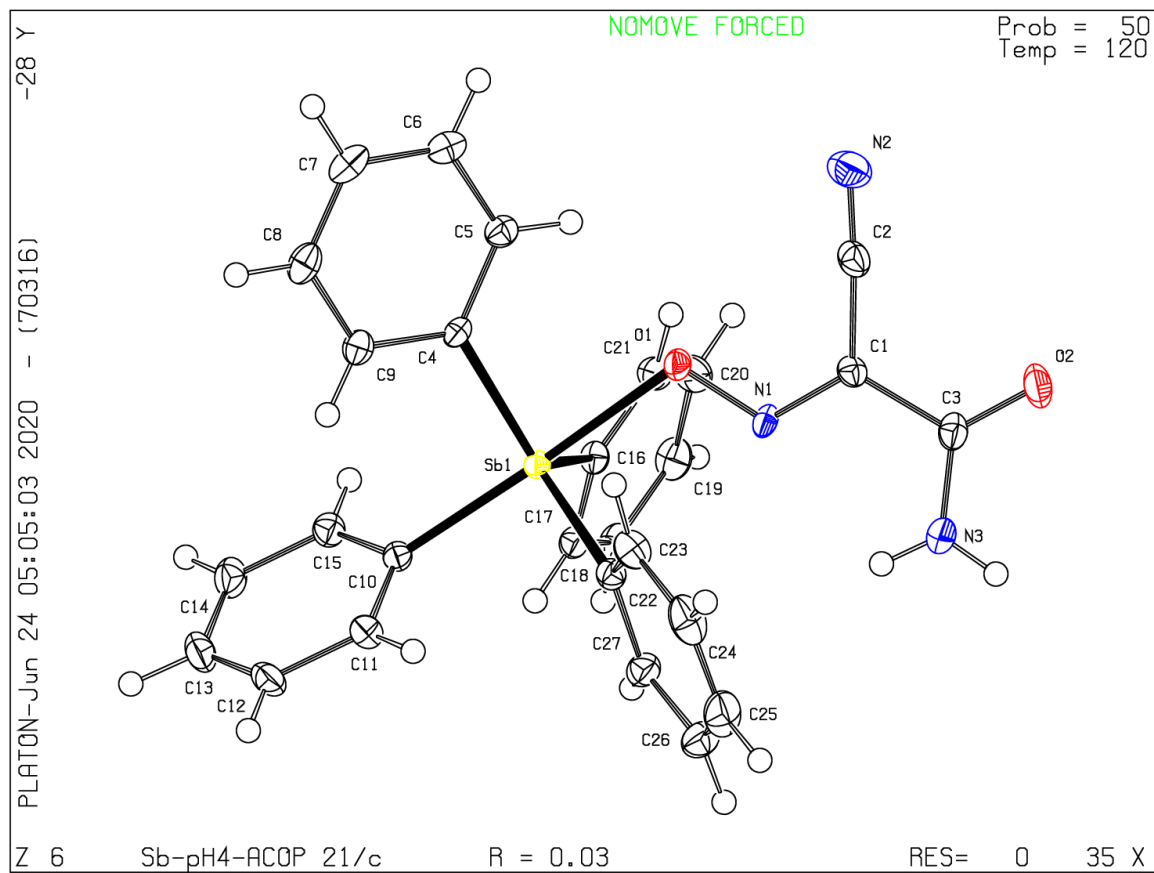

# checkCIF/PLATON (basic structural check)

---

*Structure factors have been supplied for datablock(s) Sb-Ph4-ECI-oxo-dimer*

No syntax errors found.

Please wait while processing ....

[CIF dictionary](#)

[Interpreting this report](#)

## [Structure factor report](#)

### Datablock: **Sb-Ph4-ECO-oxo-dimer**

---

Bond precision: C-C = 0.0024 Å      Wavelength=0.71073

Cell:            a=9.1828(9)      b=10.0829(10)      c=13.4714(16)  
                  alpha=111.957(1) beta=103.200(2) gamma=95.405(1)

Temperature: 120 K

|                        | Calculated        | Reported          |
|------------------------|-------------------|-------------------|
| Volume                 | 1103.8(2)         | 1103.8(2)         |
| Space group            | P -1              | P -1              |
| Hall group             | -P 1              | -P 1              |
| Moiety formula         | C46 H40 N4 O7 Sb2 | C46 H40 N4 O7 Sb2 |
| Sum formula            | C46 H40 N4 O7 Sb2 | C46 H40 N4 O7 Sb2 |
| Mr                     | 1004.34           | 1004.32           |
| Dx, g cm <sup>-3</sup> | 1.511             | 1.511             |
| Z                      | 1                 | 1                 |
| Mu (mm <sup>-1</sup> ) | 1.277             | 1.277             |
| F000                   | 502.0             | 502.0             |
| F000'                  | 501.02            |                   |
| h, k, lmax             | 13, 14, 19        | 13, 14, 19        |
| Nref                   | 6741              | 6688              |
| Tmin, Tmax             | 0.712, 0.795      | 0.824, 1.000      |
| Tmin'                  | 0.282             |                   |

Correction method= # Reported T Limits:

Tmin=0.824 Tmax=1.000 AbsCorr = NUMERICAL

Data completeness= 0.992 Theta(max)= 30.508

R(reflections)= 0.0188( 6300) wR2(reflections)= 0.0447( 6688)

S = 1.079 Npar= 348

---

The following ALERTS were generated. Each ALERT has the format

**test-name\_ALERT\_alert-type\_alert-level.**

Click on the hyperlinks for more details of the test.

---

### ● Alert level C

[PLAT094 ALERT 2 C](#) Ratio of Maximum / Minimum Residual Density .... 2.52  
Report

---

### ● Alert level G

|                                   |                                                  |              |
|-----------------------------------|--------------------------------------------------|--------------|
| <a href="#">PLAT063 ALERT 4 G</a> | Crystal Size Possibly too Large for Beam Size .. | 0.98 mm      |
| <a href="#">PLAT164 ALERT 4 G</a> | Nr. of Refined C-H H-Atoms in Heavy-Atom Struct. | 20 Note      |
| <a href="#">PLAT720 ALERT 4 G</a> | Number of Unusual/Non-Standard Labels .....      | 1 Note       |
| <a href="#">PLAT883 ALERT 1 G</a> | No Info/Value for _atom_sites_solution_primary . | Please Do !  |
| <a href="#">PLAT912 ALERT 4 G</a> | Missing # of FCF Reflections Above STh/L= 0.600  | 52 Note      |
| <a href="#">PLAT941 ALERT 3 G</a> | Average HKL Measurement Multiplicity .....       | 2.6 Low      |
| <a href="#">PLAT965 ALERT 2 G</a> | The SHELXL WEIGHT Optimisation has not Converged | Please Check |
| <a href="#">PLAT978 ALERT 2 G</a> | Number C-C Bonds with Positive Residual Density. | 16 Info      |

---

---

**PLATON version of 04/06/2020; check.def file version of 02/06/2020**

**Datablock Sb-Ph4-ECO-oxo-dimer - ellipsoid plot**

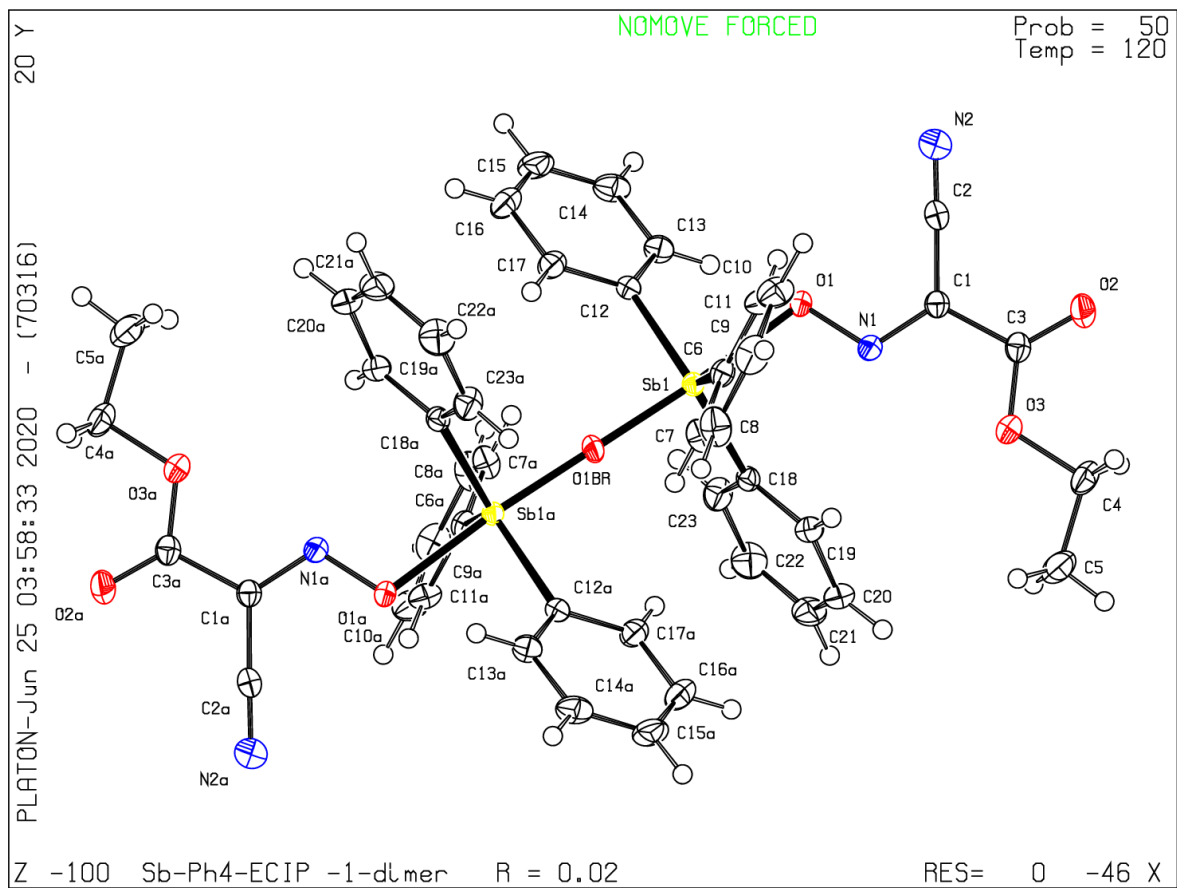

# checkCIF/PLATON (basic structural check)

---

*Structure factors have been supplied for datablock(s) Sb-Ph4-ECO-monomer*

No syntax errors found.

Please wait while processing ....

[CIF dictionary](#)

[Interpreting this report](#)

## [Structure factor report](#)

### Datablock: **Sb-Ph4-ECO-monomer**

---

Bond precision: C-C = 0.0080 Å      Wavelength=0.71073

Cell:            a=9.7871(6) b=14.9208(9)    c=17.6984(11)

                 alpha=90    beta=94.613(1) gamma=90

Temperature: 120 K

|                        | Calculated       | Reported         |
|------------------------|------------------|------------------|
| Volume                 | 2576.2(3)        | 2576.1(3)        |
| Space group            | P n              | P n              |
| Hall group             | P -2yac          | P -2yac          |
| Moiety formula         | C29 H25 N2 O3 Sb | C29 H25 N2 O3 Sb |
| Sum formula            | C29 H25 N2 O3 Sb | C29 H25 N2 O3 Sb |
| Mr                     | 571.27           | 571.26           |
| Dx, g cm <sup>-3</sup> | 1.473            | 1.473            |
| Z                      | 4                | 4                |
| Mu (mm <sup>-1</sup> ) | 1.103            | 1.103            |
| F000                   | 1152.0           | 1152.0           |
| F000'                  | 1150.07          |                  |
| h, k, lmax             | 15, 22, 27       | 14, 22, 26       |
| Nref                   | 19496[ 9759]     | 9092             |
| Tmin, Tmax             | 0.815, 0.849     | 0.653, 0.747     |
| Tmin'                  | 0.791            |                  |

Correction method= # Reported T Limits:

Tmin=0.653 Tmax=0.747 AbsCorr = MULTI-SCAN

Data completeness= 0.93/0.47 Theta(max)= 33.076

R(reflections)= 0.0351( 8454) wR2(reflections)= 0.0774( 9092)

S = 1.193 Npar= 654

---

The following ALERTS were generated. Each ALERT has the format

**test-name\_ALERT\_alert-type\_alert-level.**

Click on the hyperlinks for more details of the test.

---

## ● Alert level C

[STRVA01 ALERT 4 C](#) Flack test results are ambiguous.

From the CIF: `_refine_ls_abs_structure_Flack` 0.530

From the CIF: `_refine_ls_abs_structure_Flack_su` 0.040

|                                   |                                                  |              |
|-----------------------------------|--------------------------------------------------|--------------|
| <a href="#">PLAT220 ALERT 2 C</a> | NonSolvent Resd 1 C Ueq(max) / Ueq(min) Range    | 3.2 Ratio    |
| <a href="#">PLAT220 ALERT 2 C</a> | NonSolvent Resd 2 C Ueq(max) / Ueq(min) Range    | 3.3 Ratio    |
| <a href="#">PLAT222 ALERT 3 C</a> | NonSolvent Resd 1 H Uiso(max)/Uiso(min) Range    | 6.6 Ratio    |
| <a href="#">PLAT342 ALERT 3 C</a> | Low Bond Precision on C-C Bonds .....            | 0.00802 Ang. |
| <a href="#">PLAT907 ALERT 2 C</a> | Flack x > 0.5, Structure Needs to be Inverted? . | 0.53 Check   |
| <a href="#">PLAT914 ALERT 3 C</a> | No Bijvoet Pairs in FCF for Non-centro Structure | Please Check |
| <a href="#">PLAT971 ALERT 2 C</a> | Check Calcd Resid. Dens. 0.85A From Sb1B         | 1.73 eA-3    |

### And 2 other PLAT971 Alerts

|                                   |                                           |            |
|-----------------------------------|-------------------------------------------|------------|
| <a href="#">PLAT971 ALERT 2 C</a> | Check Calcd Resid. Dens. 1.30A From C18B  | 1.51 eA-3  |
| <a href="#">PLAT971 ALERT 2 C</a> | Check Calcd Resid. Dens. 0.64A From Sb1A  | 1.51 eA-3  |
| <a href="#">PLAT977 ALERT 2 C</a> | Check Negative Difference Density on H13A | -0.41 eA-3 |

### And 2 other PLAT977 Alerts

|                                   |                                           |            |
|-----------------------------------|-------------------------------------------|------------|
| <a href="#">PLAT977 ALERT 2 C</a> | Check Negative Difference Density on H16B | -0.32 eA-3 |
| <a href="#">PLAT977 ALERT 2 C</a> | Check Negative Difference Density on H26A | -0.35 eA-3 |

---

## ● Alert level G

|                                   |                                                  |      |              |
|-----------------------------------|--------------------------------------------------|------|--------------|
| <a href="#">PLAT083 ALERT 2 G</a> | SHELXL Second Parameter in WGHT Unusually Large  | 5.57 | Why ?        |
| <a href="#">PLAT164 ALERT 4 G</a> | Nr. of Refined C-H H-Atoms in Heavy-Atom Struct. | 5    | Note         |
| <a href="#">PLAT720 ALERT 4 G</a> | Number of Unusual/Non-Standard Labels .....      | 10   | Note         |
| <a href="#">PLAT883 ALERT 1 G</a> | No Info/Value for _atom_sites_solution_primary . |      | Please Do !  |
| <a href="#">PLAT912 ALERT 4 G</a> | Missing # of FCF Reflections Above STh/L= 0.600  | 656  | Note         |
| <a href="#">PLAT933 ALERT 2 G</a> | Number of OMIT Records in Embedded .res File ... | 5    | Note         |
| <a href="#">PLAT941 ALERT 3 G</a> | Average HKL Measurement Multiplicity .....       | 1.0  | Low          |
| <a href="#">PLAT961 ALERT 5 G</a> | Dataset Contains no Negative Intensities .....   |      | Please Check |
| <a href="#">PLAT978 ALERT 2 G</a> | Number C-C Bonds with Positive Residual Density. | 0    | Info         |
| <a href="#">PLAT992 ALERT 5 G</a> | Repd & Actual _reflns_number_gt Values Differ by | 8    | Check        |

---

**PLATON version of 04/06/2020; check.def file version of 02/06/2020**

**Datablock Sb-Ph4-ECO-monomer - ellipsoid plot**

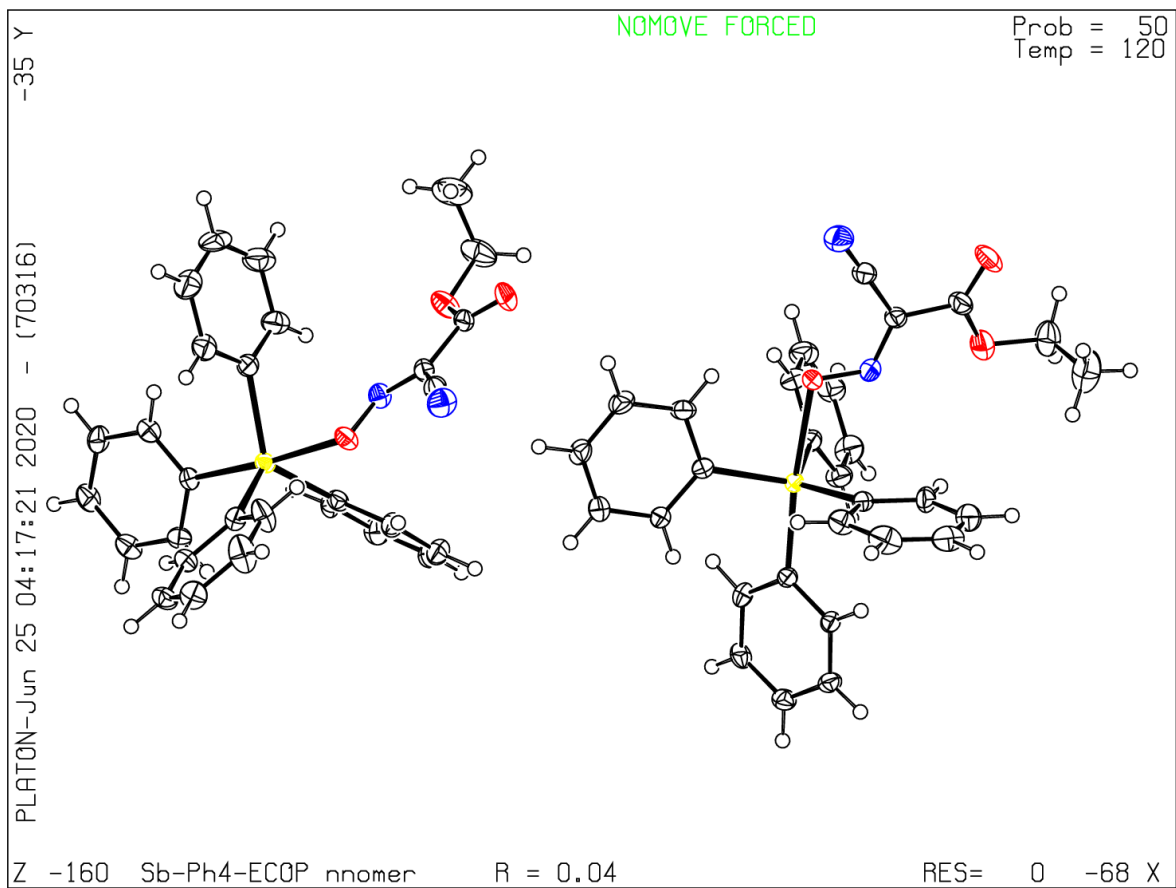



# checkCIF/PLATON (basic structural check)

---

*Structure factors have been supplied for datablock(s) Sb-Ph4-MCO*

No syntax errors found.  
Please wait while processing ....

[CIF dictionary](#)  
[Interpreting this report](#)

## Structure factor report

**Datablock: Sb-Ph4-MCO**

---

Bond precision: C-C = 0.0065 Å      Wavelength=0.71073

Cell:            a=17.6451(4) b=10.8777(3)    c=28.3876(7)

                 alpha=90      beta=94.836(1) gamma=90

Temperature: 100 K

|                        | Calculated       | Reported         |
|------------------------|------------------|------------------|
| Volume                 | 5429.3(2)        | 5429.3(2)        |
| Space group            | P 21/c           | P 21/c           |
| Hall group             | -P 2ybc          | -P 2ybc          |
| Moiety formula         | C31 H28 N3 O3 Sb | C31 H28 N3 O3 Sb |
| Sum formula            | C31 H28 N3 O3 Sb | C31 H28 N3 O3 Sb |
| Mr                     | 612.32           | 612.31           |
| Dx, g cm <sup>-3</sup> | 1.498            | 1.498            |
| Z                      | 8                | 8                |
| Mu (mm <sup>-1</sup> ) | 1.054            | 1.054            |
| F000                   | 2480.0           | 2480.0           |
| F000'                  | 2476.19          |                  |
| h, k, lmax             | 22, 13, 35       | 22, 13, 35       |
| Nref                   | 11273            | 11251            |
| Tmin, Tmax             | 0.863, 0.881     | 0.689, 0.745     |

Tmin' 0.863

Correction method= # Reported T Limits:  
Tmin=0.689 Tmax=0.745 AbsCorr = MULTI-SCAN

Data completeness= 0.998 Theta(max)= 26.516

R(reflections)= 0.0447( 9235) wR2(reflections)= 0.1109( 11251)

S = 1.114 Npar= 750

---

The following ALERTS were generated. Each ALERT has the format

**test-name\_ALERT\_alert-type\_alert-level.**

Click on the hyperlinks for more details of the test.

---

### ● Alert level C

|                                   |                                                  |       |        |
|-----------------------------------|--------------------------------------------------|-------|--------|
| <a href="#">PLAT094 ALERT 2 C</a> | Ratio of Maximum / Minimum Residual Density .... | 3.19  | Report |
| <a href="#">PLAT222 ALERT 3 C</a> | NonSolvent Resd 2 H Uiso(max)/Uiso(min) Range    | 7.7   | Ratio  |
| <a href="#">PLAT245 ALERT 2 C</a> | U(iso) H28A Smaller than U(eq) C28A by           | 0.017 | Ang**2 |

#### And 3 other PLAT245 Alerts

|                                   |                                                 |       |        |
|-----------------------------------|-------------------------------------------------|-------|--------|
| <a href="#">PLAT245 ALERT 2 C</a> | U(iso) H13B Smaller than U(eq) C13B by          | 0.012 | Ang**2 |
| <a href="#">PLAT245 ALERT 2 C</a> | U(iso) H21B Smaller than U(eq) C21B by          | 0.014 | Ang**2 |
| <a href="#">PLAT245 ALERT 2 C</a> | U(iso) H30B Smaller than U(eq) C30B by          | 0.012 | Ang**2 |
| <a href="#">PLAT906 ALERT 3 C</a> | Large K Value in the Analysis of Variance ..... | 4.570 | Check  |
| <a href="#">PLAT911 ALERT 3 C</a> | Missing FCF Refl Between Thmin & STh/L= 0.600   | 9     | Report |
| <a href="#">PLAT971 ALERT 2 C</a> | Check Calcd Resid. Dens. 1.05A From C26B        | 1.94  | eA-3   |
| <a href="#">PLAT971 ALERT 2 C</a> | Check Calcd Resid. Dens. 1.18A From Sb1A        | 1.65  | eA-3   |
| <a href="#">PLAT975 ALERT 2 C</a> | Check Calcd Resid. Dens. 0.81A From O1A         | 0.57  | eA-3   |

---

### ● Alert level G

|                                   |                                                       |       |  |
|-----------------------------------|-------------------------------------------------------|-------|--|
| <a href="#">PLAT083 ALERT 2 G</a> | SHELXL Second Parameter in WGHT Unusually Large Why ? | 14.34 |  |
| <a href="#">PLAT164 ALERT 4 G</a> | Nr. of Refined C-H H-Atoms in Heavy-Atom Struct. Note | 16    |  |

|                                   |                                                  |        |
|-----------------------------------|--------------------------------------------------|--------|
| <a href="#">PLAT232 ALERT 2 G</a> | Hirshfeld Test Diff (M-X) Sb1A --O1A .           | 5.3    |
|                                   | s.u.                                             |        |
| <a href="#">PLAT398 ALERT 2 G</a> | Deviating C-O-C Angle From 120 for O3B           | 109.9  |
|                                   | Degree                                           |        |
| <a href="#">PLAT720 ALERT 4 G</a> | Number of Unusual/Non-Standard Labels .....      | 16     |
|                                   | Note                                             |        |
| <a href="#">PLAT883 ALERT 1 G</a> | No Info/Value for _atom_sites_solution_primary . | Please |
|                                   | Do !                                             |        |
| <a href="#">PLAT912 ALERT 4 G</a> | Missing # of FCF Reflections Above STh/L= 0.600  | 15     |
|                                   | Note                                             |        |
| <a href="#">PLAT933 ALERT 2 G</a> | Number of OMIT Records in Embedded .res File ... | 10     |
|                                   | Note                                             |        |
| <a href="#">PLAT965 ALERT 2 G</a> | The SHELXL WEIGHT Optimisation has not Converged | Please |
|                                   | Check                                            |        |
| <a href="#">PLAT978 ALERT 2 G</a> | Number C-C Bonds with Positive Residual Density. | 2      |
|                                   | Info                                             |        |

---

**PLATON version of 04/06/2020; check.def file version of 02/06/2020**

**Datablock Sb-Ph4-MCO - ellipsoid plot**

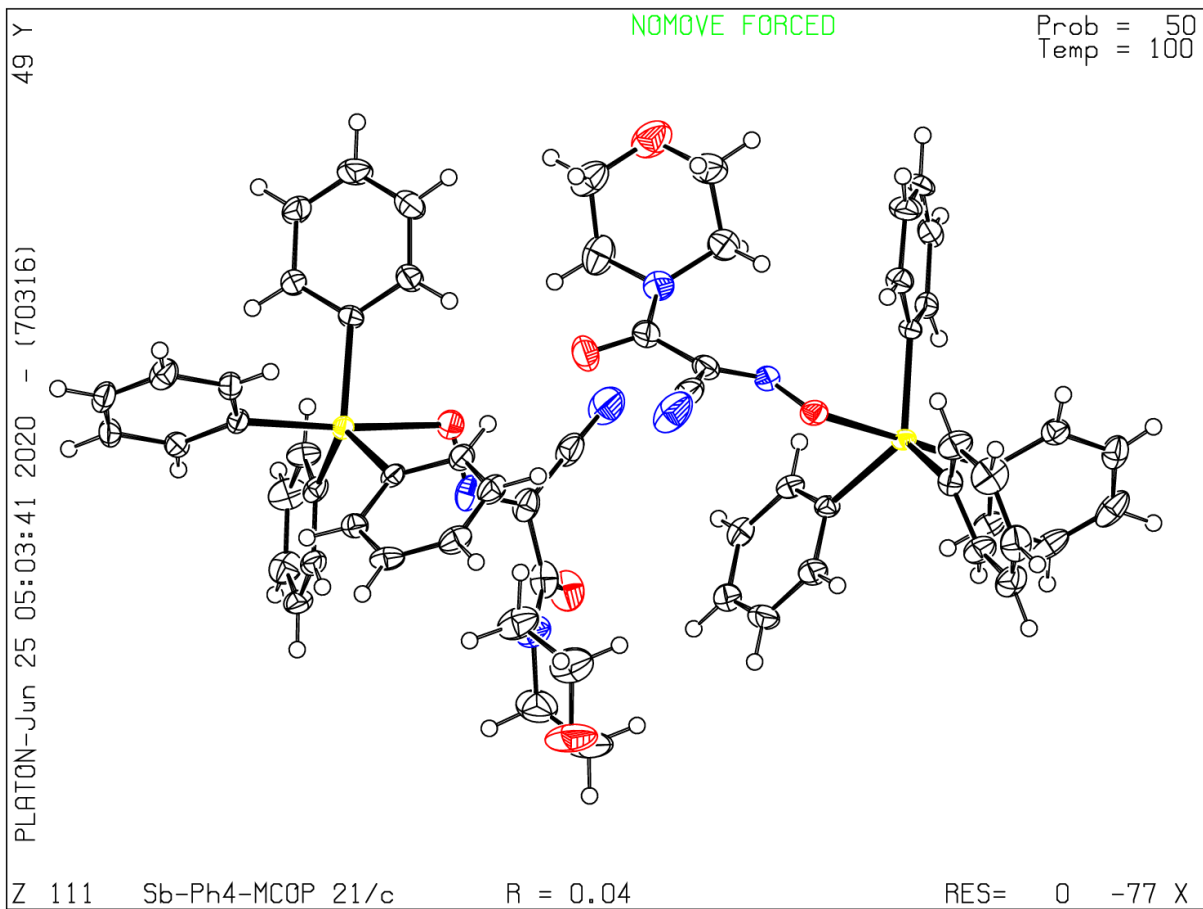

Supplement: s1 [file s1]
